# Supplementary material for: Geometry engineering of a multiple resonance core via a phenyl-embedded strategy toward highly efficient narrowband blue OLEDs
Source: Royal Society of Chemistry journal article supplement (doi:10.1039/d3mh00617d), 2023-01-01
Supplement: d3mh00617d1.pdf [file d3mh00617d1.pdf]

## ***Supporting Information***

### **Geometry Engineering of Multiple Resonance Core via Phenyl-Embedded Strategy toward Highly Efficient Narrowband Blue OLEDs**

*Yimin Wu,<sup>a</sup> Xiaoyu Liu,<sup>a</sup> Junjie Liu,<sup>a</sup> Ge Yang,<sup>a</sup> Songyan Han,<sup>a</sup> Dezhi Yang,<sup>b</sup>  
Xiaosong Cao,<sup>c</sup> Dongge Ma,<sup>b</sup> Zhengyang Bin<sup>\*a</sup> and Jingsong You<sup>\*a</sup>*

*<sup>a</sup>Key Laboratory of Green Chemistry and Technology of Ministry of Education,  
College of Chemistry, Sichuan University, 29 Wangjiang Road,  
Chengdu 610064, People's Republic of China.*

*<sup>b</sup>Institute of Polymer Optoelectronic Materials and Devices, State Key Laboratory of  
Luminescent Materials and Devices, South China University of Technology,  
Guangzhou 510640, People's Republic of China.*

*<sup>c</sup>Shenzhen Key Laboratory of New Information Display and Storage Materials,  
College of Materials Science and Engineering, Shenzhen University,  
Shenzhen 518060, People's Republic of China.*

*\*Correspondence to: binzhengyang@scu.edu.cn; jsyou@scu.edu.cn*

## Table of Contents

|                                                                   |     |
|-------------------------------------------------------------------|-----|
| I. General Remarks.....                                           | S3  |
| II. OLED Fabrication and Characterization.....                    | S4  |
| III. Synthesis and Characterization.....                          | S4  |
| IV. Method of Theoretical Calculations .....                      | S12 |
| V. Crystal Data.....                                              | S13 |
| VI. Additional Spectra and Data.....                              | S19 |
| VII. References.....                                              | S25 |
| VIII. Copies of $^1\text{H}$ and $^{13}\text{C}$ NMR Spectra..... | S27 |
| IX. Copies of HPLC Spectra.....                                   | S36 |

## I. General Remarks

NMR spectra were recorded on an Agilent 400-MR DD2 spectrometer. The  $^1\text{H}$  NMR (400 MHz) chemical shifts were measured relative to  $\text{CDCl}_3$  or  $\text{DMSO-}d_6$  as the internal reference ( $\text{DMSO-}d_6$ :  $\delta = 2.50$  ppm;  $\text{CDCl}_3$ :  $\delta = 7.26$  ppm). The  $^{13}\text{C}$  NMR (100 MHz) chemical shifts were given using  $\text{CDCl}_3$  or  $\text{DMSO-}d_6$  as the internal standard ( $\text{DMSO-}d_6$ :  $\delta = 39.52$  ppm;  $\text{CDCl}_3$ :  $\delta = 77.16$  ppm). High-resolution mass spectra (HRMS) were obtained with a Shimadzu LCMS-IT-TOF (ESI). X-Ray single-crystal diffraction data were collected on a Bruker D8 VENTURE single crystal diffractometer. Absorption spectra were measured on a HITACHI U-2910. Fluorescence spectra and photoluminescence quantum yield were collected on a Horiba Jobin Yvon-Edison Fluoromax-3 fluorescence spectrometer with a calibrated integrating sphere system with the excitation wavelength of 365 nm. Phosphorescence spectra were collected on a HITACHI F-7100 fluorescence spectrophotometer and a Horiba Jobin Yvon-Edison Fluoromax-3 fluorescence spectrometer with the excitation wavelength of 365 nm. Transient photoluminescence decay spectra were obtained with Horiba Single Photon Counting Controller: FluoroHub and Horiba TBX Picosecond Photon Detection with the excitation wavelength of 365 nm. Thermogravimetric analysis (TGA) was carried out using DTG-60(H) at a rate of 10  $^{\circ}\text{C}/\text{min}$  under nitrogen atmosphere. Cyclic voltammogram (CV) were performed on LK2005A with a solution of tetrabutylammonium hexafluorophosphate ( $\text{Bu}_4\text{NPF}_6$ , 0.1 M) in dichloromethane (DCM) as electrolyte and ferrocene/ferrocenium ( $\text{Fc}/\text{Fc}^+$ ) as standard. Three-electrode system ( $\text{Ag}/\text{Ag}^+$ , platinum wire and glassy carbon electrode as reference, counter and work electrode respectively) was used in the CV measurement. HPLC analysis was conducted on a Shimadzu Prominence Modular HPLC system. HPLC traces were performed using a Daicel analytical column in hexane and isopropyl alcohol.

All commercially available reagents and chemicals were used as received without further purification. Unless otherwise noted, all reactions were carried out using Schlenk techniques under a nitrogen atmosphere. The solvents were dried and purified using an Innovative Technology PS-MD-5 Solvent Purification System. *pe-QAO*,<sup>1</sup> *QAO*<sup>2</sup> and 9*H*-tribenzo[*b,d,f*]azepine (TBA)<sup>3</sup> were prepared according to the literature procedures.

## II. OLED Fabrication and Characterization

Indium-tin-oxide (ITO) coated glass with a sheet resistance of  $15 \Omega \text{ sq}^{-1}$  was used as the anode substrate. Ahead of film deposition, ITO substrates were cleaned with alkaline detergent, boiled deionized water, deionized water in ultrasonic bath, dried in an oven, and finally treated with oxygen plasma for 10 min to enhance the surface work function of ITO anode. All organic layers were deposited with the rate of  $0.1 \text{ nm}\cdot\text{s}^{-1}$  under high vacuum. The doped and co-doped layers were prepared by co-evaporating dopant and host material from two individual sources, and the doping concentrations were modulated by controlling the evaporation rates of dopant.

Current density-voltage-luminance ( $J$ - $V$ - $L$ ) characteristics were measured by using KEYSIGHT B1500A. The luminance and electroluminescence spectra were collected with model DLM-100Z photometer and OPT2000 spectrophotometer, respectively.

## III. Synthesis and Characterization

### 1) Synthesis of [5]he-BQAO and [6]he-BQAO

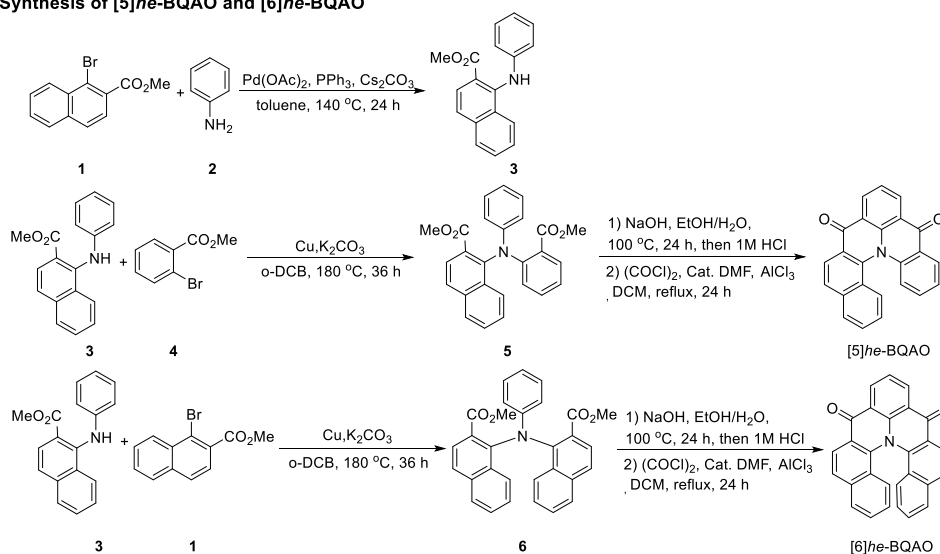

### 2) Synthesis of *hp*-BQAO and *hp*-MBQAO

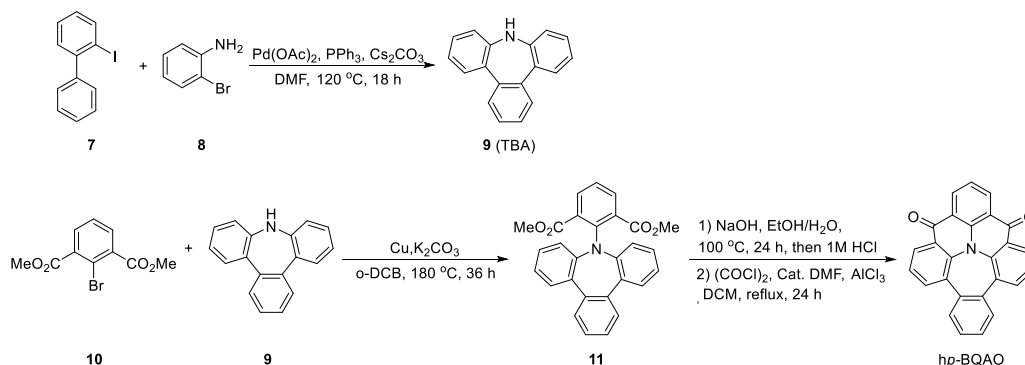

**Scheme S1.** Synthesis of [5]he-BQAO, [6]he-BQAO and *hp*-BQAO.

### Synthesis of methyl 1-(phenylamino)-2-naphthoate (**3**)

A flame-dried Schlenk test tube with a magnetic stirring bar was charged with **1** (1.0 mmol, 1.0 equiv), **2** (1.2 equiv), Pd(OAc)<sub>2</sub> (5.0 mol%), PPh<sub>3</sub> (10 mol%), Cs<sub>2</sub>CO<sub>3</sub> (2.0 equiv), and toluene (2.0 mL). The reaction mixture was allowed to stir for 5 min at room temperature under an N<sub>2</sub> atmosphere, and then heated at 140 °C in a pre-heated oil bath for 24 h. The reaction mixture was then cooled to room temperature, diluted with 10.0 mL of DCM, filtered through a celite pad, and washed with 25.0-35.0 mL of DCM. The combined organic extracts were concentrated under reduced pressure and the resulting residue was purified *via* silica gel column chromatography (petroleum ether/DCM = 4/1, v/v) to afford the desired product **3** as a white solid (279.1 mg, 93% yield). <sup>1</sup>H NMR (400 MHz, CDCl<sub>3</sub>): δ = 3.93 (s, 3H), 6.81 (d, *J* = 7.6 Hz, 2H), 6.92 (t, *J* = 7.6 Hz, 1H), 7.15-7.20 (m, 2H), 7.28-7.33 (m, 1H), 7.50-7.54 (m, 2H), 7.82 (d, *J* = 8.0 Hz, 1H), 7.96 (d, *J* = 7.6 Hz, 1H), 8.00 (d, *J* = 8.8 Hz, 1H), 9.42 (s, 1H) ppm. <sup>13</sup>C NMR (100 MHz, CDCl<sub>3</sub>): δ = 52.3, 115.3, 118.7, 121.4, 122.2, 125.4, 126.2, 127.36, 127.43, 128.3, 128.4, 129.1, 136.8, 145.2, 146.0, 169.1 ppm. HRMS (ESI<sup>+</sup>): calcd for C<sub>18</sub>H<sub>15</sub>NNaO<sub>2</sub> [M+Na]<sup>+</sup> 300.0995, found 300.0991.

### Synthesis of methyl 1-((2-(methoxycarbonyl)phenyl)-(phenyl)amino)-2-naphthoate (**5**)

A flame-dried Schlenk test tube with a magnetic stirring bar was charged with **3** (1.0 mmol, 1.0 equiv), **4** (2.0 equiv), Cu (50 mol%), K<sub>2</sub>CO<sub>3</sub> (2.5 equiv), and 1,2-dichlorobenzene (*o*-DCB) (2.0 mL). The reaction mixture was allowed to stir for 5 min at room temperature under an N<sub>2</sub> atmosphere, and then heated at 180 °C in a pre-heated oil bath for 36 h. The reaction mixture was then cooled to room temperature, diluted with 10.0 mL of DCM, filtered through a celite pad, and washed with 25.0-35.0 mL of DCM. The combined organic extracts were concentrated under reduced pressure and the resulting residue was purified *via* silica gel column chromatography (petroleum ether/DCM = 1/4, v/v) to afford the desired product **5** as a white solid (377.6 mg, 87% yield). <sup>1</sup>H NMR (400 MHz, CDCl<sub>3</sub>): δ = 3.29 (s, 3H), 3.48 (s, 3H), 6.54 (d, *J* = 6.4 Hz, 1H), 6.83-6.88 (m, 2H), 6.99-7.09 (m, 3H), 7.16 (t, *J* = 7.2 Hz, 1H), 7.23 (t, *J* = 7.2 Hz, 1H), 7.43 (t, *J* = 7.6 Hz, 1H), 7.53 (t, *J* = 7.6 Hz, 1H), 7.66 (d, *J* = 6.4 Hz, 1H), 7.70 (d, *J* = 4.0 Hz, 1H), 7.84 (d, *J* = 8.4 Hz, 1H), 7.88 (d, *J* = 8.0 Hz, 1H), 8.47 (d, *J* = 8.4 Hz, 1H) ppm. <sup>13</sup>C NMR (100 MHz, CDCl<sub>3</sub>): δ =

51.7, 52.2, 119.8, 122.1, 122.2, 122.3, 124.2, 125.2, 126.1, 126.4, 127.2, 127.6, 128.0, 128.2, 128.5, 129.26, 129.28, 130.9, 132.1, 132.5, 136.6, 143.3, 145.8, 149.2, 168.2, 168.7 ppm. HRMS (ESI<sup>+</sup>): calcd for C<sub>26</sub>H<sub>21</sub>NNaO<sub>4</sub> [M+Na]<sup>+</sup> 434.1363, found 434.1365.

### Synthesis of dimethyl 1,1'-(phenylazanediy)bis(2-naphthoate) (**6**)

A flame-dried Schlenk test tube with a magnetic stirring bar was charged with **3** (1.0 mmol, 1.0 equiv), **1** (2.0 equiv), Cu (50 mol%), K<sub>2</sub>CO<sub>3</sub> (2.5 equiv), and *o*-DCB (2.0 mL). The reaction mixture was allowed to stir for 5 min at room temperature under an N<sub>2</sub> atmosphere, and then heated at 180 °C in a pre-heated oil bath for 36 h. The reaction mixture was then cooled to room temperature, diluted with 10.0 mL of DCM, filtered through a celite pad, and washed with 25.0-35.0 mL of DCM. The combined organic extracts were concentrated under reduced pressure and the resulting residue was purified *via* silica gel column chromatography (petroleum ether/DCM = 1/6, v/v) to afford the desired product **6** as a white solid (280.7 mg, 58% yield). NMR spectra were difficult to interpret precisely due to large peak broadening, however, further conformation of structure can be made by HRMS and X-ray crystallography. The single crystal of **6** for X-ray crystallography was obtained by slow diffusion of hexane into a concentrated solution of **6** in DCM at room temperature. <sup>1</sup>H NMR (400 MHz, CDCl<sub>3</sub>): δ = 3.02 (bs, 6H), 6.90-6.95 (m, 3H), 7.14-7.20 (m, 4H), 7.39 (t, *J* = 7.6 Hz, 2H), 7.49 (bs, 2H), 7.69 (d, *J* = 8.4 Hz, 2H), 7.78 (d, *J* = 8.4 Hz, 2H), 8.02 (bs, 2H) ppm. <sup>13</sup>C NMR (100 MHz, CDCl<sub>3</sub>): δ = 51.9, 122.2, 125.8, 126.0, 127.1, 128.2, 129.1, 130.1, 136.3, 169.0 ppm. HRMS (ESI<sup>+</sup>): calcd for C<sub>30</sub>H<sub>23</sub>NNaO<sub>4</sub> [M+Na]<sup>+</sup> 484.1519, found 484.1516.

### Synthesis of [5]*he*-BQAO

A round bottom flask with a magnetic stirring bar was charged with **5** (1.0 mmol, 1.0 equiv), NaOH (20.0 equiv) and EtOH/H<sub>2</sub>O = 1/1 (10.0 mL). The reaction mixture was heated at 100 °C in a pre-heated oil bath for 24 h. The reaction mixture was then cooled to room temperature, and volatile was evaporated under reduced pressure. The remaining solid was dissolved in 20.0 mL of H<sub>2</sub>O, and acidified with 1.0 M HCl (aq). The resulting mixture was extracted with ethyl acetate (3 × 10.0 mL) and the combined organic layers were dried over anhydrous Na<sub>2</sub>SO<sub>4</sub>. After filtration, the solvent was evaporated under reduced pressure. Then the residue was dissolved in 10.0 mL of DCM and 5 drops of *N,N*-dimethylformamide (DMF) was added. The

reaction mixture was stirred for 5 min at room temperature, and oxalyl chloride (10.0 equiv) was added in drops. After being stirred for 1 h, the reaction mixture was added with AlCl<sub>3</sub> (20.0 equiv) and refluxed for 24 h. Then the reaction mixture was cooled to room temperature and H<sub>2</sub>O (5.0 mL) was added in drops. Subsequently, the resulting mixture was extracted with DCM (3 × 10.0 mL) and the combined organic layers were dried over anhydrous Na<sub>2</sub>SO<sub>4</sub>. After filtration, the solvent was evaporated under reduced pressure and the residue was purified *via* silica gel column chromatography (petroleum ether/DCM/ethyl acetate = 6/2/1, v/v/v) to afford the desired product **[5]he-BQAO** as a yellow solid (299.7 mg, 81% yield). The single crystal of **[5]he-BQAO** for X-ray crystallography was obtained by temperature gradient vacuum sublimation process. <sup>1</sup>H NMR (400 MHz, CDCl<sub>3</sub>): δ = 7.05 (d, *J* = 8.0 Hz, 1H), 7.26-7.42 (m, 3H), 7.49 (d, *J* = 8.8 Hz, 1H), 7.59 (t, *J* = 7.2 Hz, 1H), 7.67 (t, *J* = 7.6 Hz, 1H), 7.93 (d, *J* = 8.8 Hz, 1H), 7.97 (d, *J* = 7.6 Hz, 1H), 8.40-8.45 (m, 2H), 8.68-8.73 (m, 2H) ppm. <sup>13</sup>C NMR (100 MHz, CDCl<sub>3</sub>): δ = 121.6, 122.2, 124.0, 124.1, 124.4, 124.9, 125.1, 125.70, 125.76, 125.81, 127.0, 127.2, 127.6, 128.8, 129.1, 132.2, 132.4, 132.6, 136.5, 137.9, 140.7, 142.3, 178.8, 179.7 ppm. HRMS (ESI<sup>+</sup>): calcd for C<sub>24</sub>H<sub>13</sub>NNaO<sub>2</sub> [M+Na]<sup>+</sup> 370.0838, found 370.0834.

### Synthesis of **[6]he-BQAO**

A round bottom flask with a magnetic stirring bar was charged with **6** (1.0 mmol, 1.0 equiv), NaOH (20.0 equiv), and EtOH/H<sub>2</sub>O = 1/1 (10.0 mL). The reaction mixture was heated at 100 °C in a pre-heated oil bath for 24 h. The reaction mixture was then cooled to room temperature, and volatile was evaporated under reduced pressure. The remaining solid was dissolved in 20.0 mL of H<sub>2</sub>O, and acidified with 1 M HCl (aq). The resulting mixture was extracted with ethyl acetate (3 × 10.0 mL) and the combined organic layers were dried over anhydrous Na<sub>2</sub>SO<sub>4</sub>. After filtration, the solvent was evaporated under reduced pressure. Then the residue was dissolved in 10.0 mL of DCM and 5 drops of DMF was added. The reaction mixture was stirred for 5 min at room temperature, and oxalyl chloride (10.0 equiv) was added in drops. After being stirred for 1 h, the reaction mixture was added with AlCl<sub>3</sub> (20.0 equiv) and refluxed for 24 h. Then the reaction mixture was cooled to room temperature and H<sub>2</sub>O (5.0 mL) was added in drops. Subsequently, the resulting mixture was extracted with DCM (3 × 10.0 mL). The combined organic layers were dried over anhydrous Na<sub>2</sub>SO<sub>4</sub>. After filtration, the solvent was evaporated under reduced pressure and the

residue was purified *via* silica gel column chromatography (petroleum ether/DCM/ethyl acetate = 7/2/1, v/v/v) to afford the desired product [6]*he*-BQAO as a yellow solid (222.3 mg, 53% yield). The single crystal of [6]*he*-BQAO for X-ray crystallography was obtained by temperature gradient vacuum sublimation process. <sup>1</sup>H NMR (400 MHz, CDCl<sub>3</sub>): δ = 6.79 (t, *J* = 7.6 Hz, 2H), 6.91 (d, *J* = 8.8 Hz, 2H), 7.29 (t, *J* = 8.0 Hz, 2H), 7.74 (t, *J* = 7.6 Hz, 1H), 7.81 (d, *J* = 7.6 Hz, 2H), 7.90 (d, *J* = 8.4 Hz, 2H), 8.49 (d, *J* = 8.4 Hz, 2H), 8.75 (d, *J* = 7.6 Hz, 2H) ppm. <sup>13</sup>C NMR (100 MHz, CDCl<sub>3</sub>): δ = 122.1, 124.3, 124.5, 124.8, 125.1, 125.8, 125.9, 126.7, 128.4, 128.7, 132.0, 136.1, 140.9, 141.4, 179.5 ppm. HRMS (ESI<sup>+</sup>): calcd for C<sub>28</sub>H<sub>15</sub>NNaO<sub>2</sub> [M+Na]<sup>+</sup> 420.0995, found 420.0991.

### Synthesis of 9*H*-tribenzo[*b,d,f*]azepine (**9**)<sup>3</sup>

A flame-dried round bottom flask with a magnetic stirring bar was charged with **7** (10.0 mmol, 1.0 equiv), **8** (1.5 equiv), Pd(OAc)<sub>2</sub> (5.0 mol%), PPh<sub>3</sub> (10 mol%), Cs<sub>2</sub>CO<sub>3</sub> (2.0 equiv), and DMF (30.0 mL). The reaction mixture was allowed to stir for 5 min at room temperature under an N<sub>2</sub> atmosphere, and then heated at 120 °C in a pre-heated oil bath for 18 h. The reaction mixture was then cooled to room temperature, diluted with 10.0 mL of DCM, filtered through a celite pad, and washed with 40.0-60.0 mL of DCM. The combined organic extracts were concentrated under reduced pressure and the resulting residue was purified *via* silica gel column chromatography (petroleum ether/ethyl acetate = 9/1, v/v) to afford the desired product **9** as a white solid (2.23 g, 85% yield). <sup>1</sup>H NMR (400 MHz, CDCl<sub>3</sub>): δ = 5.21 (bs, 1H), 6.91 (d, *J* = 8.0 Hz, 2H), 7.13 (t, *J* = 7.2 Hz, 2H), 7.22 (t, *J* = 7.6 Hz, 2H), 7.43-7.50 (m, 6H) ppm. <sup>13</sup>C NMR (100 MHz, CDCl<sub>3</sub>): δ = 119.9, 124.3, 127.9, 128.6, 130.2, 130.3, 132.8, 139.5, 151.1 ppm. HRMS (ESI<sup>+</sup>): calcd for C<sub>18</sub>H<sub>13</sub>NNa [M+Na]<sup>+</sup> 266.0940, found 266.0938.

### Synthesis of dimethyl 2-(9*H*-tribenzo[*b,d,f*]azepin-9-yl)isophthalate (**11**)

A flame-dried Schlenk test tube with a magnetic stirring bar was charged with **10** (1.0 mmol, 1.0 equiv), **9** (2.0 equiv), Cu (50 mol%), K<sub>2</sub>CO<sub>3</sub> (2.5 equiv), and *o*-DCB (2.0 mL). The reaction mixture was allowed to stir for 5 min at room temperature under an N<sub>2</sub> atmosphere, and then heated at 180 °C in a pre-heated oil bath for 36 h. The reaction mixture was then cooled to room temperature, diluted with 10.0 mL of DCM, filtered through a celite pad, and washed with 25.0-35.0 mL of DCM. The combined organic extracts were concentrated under reduced pressure and the resulting



residue was purified *via* silica gel column chromatography (petroleum ether/ethyl acetate = 6/1, v/v) to afford the desired product **11** as a white solid (320.4 mg, 70% yield). <sup>1</sup>H NMR (400 MHz, DMSO-*d*<sub>6</sub>): δ = 3.10 (s, 6H), 6.76 (t, *J* = 7.6 Hz, 1H), 7.29-7.39 (m, 8H), 7.55-7.58 (m, 4H), 7.74-7.76 (m, 2H) ppm. <sup>13</sup>C NMR (100 MHz, DMSO-*d*<sub>6</sub>): δ = 51.3, 116.7, 119.7, 123.6, 126.9, 128.0, 128.4, 129.0, 130.4, 132.8, 137.2, 137.7, 144.1, 147.6, 167.8 ppm. HRMS (ESI<sup>+</sup>): calcd for C<sub>28</sub>H<sub>21</sub>NNaO<sub>4</sub> [M+Na]<sup>+</sup> 458.1363, found 458.1366.

### Synthesis of *hp*-BQAO

A round bottom flask with a magnetic stirring bar was charged with **11** (1.0 mmol, 1.0 equiv), NaOH (20.0 equiv), and EtOH/H<sub>2</sub>O = 1/1 (10.0 mL). The reaction mixture was heated at 100 °C in a pre-heated oil bath for 24 h. The reaction mixture was then cooled to room temperature, and volatile was evaporated under reduced pressure. The remaining solid was dissolved in 20.0 mL of H<sub>2</sub>O, and acidified with 1 M HCl (aq). The resulting mixture was extracted with ethyl acetate (3 × 10.0 mL) and the combined organic layers were dried over anhydrous Na<sub>2</sub>SO<sub>4</sub>. After filtration, the solvent was evaporated under reduced pressure. Then the residue was dissolved in 10.0 mL of DCM and 5 drops of DMF was added. The reaction mixture was stirred for 5 min at room temperature, and oxalyl chloride (10.0 equiv) was added in drops. After being stirred for 1 h, the reaction mixture was added with AlCl<sub>3</sub> (20.0 equiv) and refluxed for 24 h. Then the reaction mixture was cooled to room temperature and H<sub>2</sub>O (5.0 mL) was added in drops. Subsequently, the resulting mixture was extracted with DCM (3 × 10.0 mL). The combined organic layers were dried over anhydrous Na<sub>2</sub>SO<sub>4</sub>. After filtration, the solvent was evaporated under reduced pressure and the residue was purified *via* silica gel column chromatography (petroleum ether/DCM/ethyl acetate = 1/9/1, v/v/v) to afford the desired product *hp*-BQAO as a red solid (346.1 mg, 88% yield). The single crystal of *hp*-BQAO for X-ray crystallography was obtained by temperature gradient vacuum sublimation process. <sup>1</sup>H NMR (400 MHz, CDCl<sub>3</sub>): δ = 6.96-7.01 (m, 2H), 7.41-7.45 (m, 2H), 7.59 (t, *J* = 7.6 Hz, 2H), 7.70 (t, *J* = 7.6 Hz, 1H), 7.85 (dd, *J* = 7.2 Hz, 2.0 Hz, 2H), 8.48 (dd, *J* = 8.0 Hz, 1.6 Hz, 2H), 8.88 (d, *J* = 8.0 Hz, 2H) ppm. <sup>13</sup>C NMR (100 MHz, CDCl<sub>3</sub>): δ = 123.2, 124.6, 125.5, 126.8, 127.5, 129.4, 131.2, 132.3, 134.1, 136.4, 138.5, 146.4, 175.6 ppm. HRMS (ESI<sup>+</sup>): calcd for C<sub>26</sub>H<sub>13</sub>NNaO<sub>2</sub> [M+Na]<sup>+</sup> 394.0838, found 394.0841.

### 3) Synthesis of *pe*-QAO and QAO

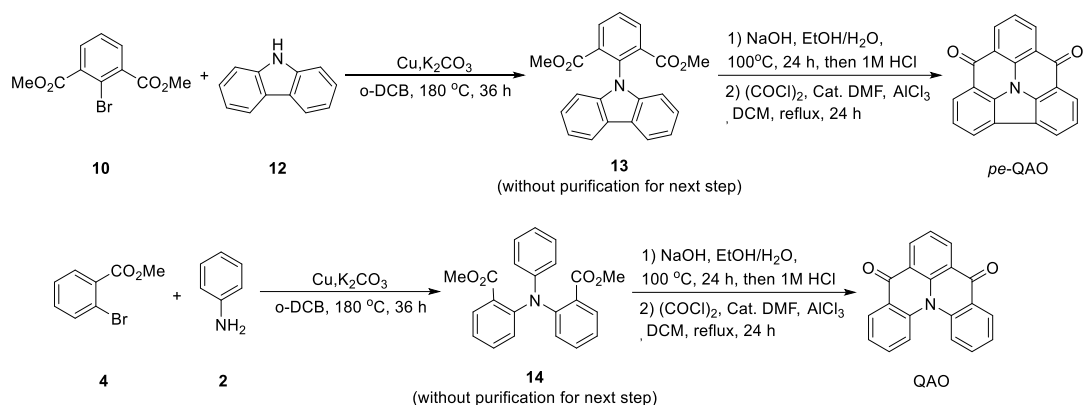

**Scheme S2.** Synthesis of *pe*-QAO and QAO.<sup>1,2</sup>

#### Synthesis of dimethyl 2-(9*H*-carbazol-9-yl)isophthalate (**13**)

A flame-dried Schlenk test tube with a magnetic stirring bar was charged with **10** (1.0 mmol, 1.0 equiv), **12** (2.0 equiv), Cu (50 mol%), K<sub>2</sub>CO<sub>3</sub> (2.5 equiv), and *o*-DCB (2.0 mL). The reaction mixture was allowed to stir for 5 min at room temperature under an N<sub>2</sub> atmosphere, and then heated at 180 °C in a pre-heated oil bath for 36 h. The reaction mixture was then cooled to room temperature, filtered through a short column of silica gel, and washed with DCM. The combined organic extracts were concentrated under reduced pressure to provide **13** and used in next step without further purification.

#### Synthesis of *pe*-QAO

A round bottom flask with a magnetic stirring bar was charged with **13** (1.0 mmol, 1.0 equiv), NaOH (20.0 equiv), and EtOH/H<sub>2</sub>O = 1/1 (10.0 mL). The reaction mixture was heated at 100 °C in a pre-heated oil bath for 24 h. The reaction mixture was then cooled to room temperature, and volatile was evaporated under reduced pressure. The remaining solid was dissolved in 20.0 mL of H<sub>2</sub>O, and acidified with 1 M HCl (aq). The resulting mixture was extracted with ethyl acetate (3 × 10.0 mL) and the combined organic layers were dried over anhydrous Na<sub>2</sub>SO<sub>4</sub>. After filtration, the solvent was evaporated under reduced pressure. Then the residue was dissolved in 10.0 mL of DCM and 5 drops of DMF was added. The reaction mixture was stirred for 5 min at room temperature, and oxalyl chloride (10.0 equiv) was added in drops. After being stirred for 1 h, the reaction mixture was added with AlCl<sub>3</sub> (20.0 equiv) and refluxed for 24 h. Then the reaction mixture was cooled to room temperature and H<sub>2</sub>O (5.0 mL) was added in drops. Subsequently, the resulting mixture was extracted with DCM (3 × 10.0 mL). The combined organic layers were dried over anhydrous

Na<sub>2</sub>SO<sub>4</sub>. After filtration, the solvent was evaporated under reduced pressure and the residue was purified *via* silica gel column chromatography (petroleum ether/DCM/ethyl acetate = 6/3/1, v/v/v) to afford the desired product **pe-QAO** as a yellow solid (200.3 mg, 63% yield). The single crystal of **pe-QAO** for X-ray crystallography was obtained by temperature gradient vacuum sublimation process. <sup>1</sup>H NMR (400 MHz, CDCl<sub>3</sub>): δ = 7.69-7.73 (m, 3H), 8.39-8.42 (m, 4H), 8.76 (d, *J* = 7.6 Hz, 2H) ppm. <sup>13</sup>C NMR (100 MHz, CDCl<sub>3</sub>): δ = 120.6, 124.4, 124.5, 125.0, 125.3, 125.6, 128.3, 133.6, 134.5, 136.7, 178.7 ppm. HRMS (ESI<sup>+</sup>): calcd for C<sub>20</sub>H<sub>9</sub>NNaO<sub>2</sub> [M+Na]<sup>+</sup> 318.0525, found 318.0529.

### Synthesis of dimethyl 2,2'-(phenylazanediyloxy)dibenzoate (**14**)

A flame-dried Schlenk test tube with a magnetic stirring bar was charged with **2** (1.0 mmol, 1.0 equiv), **4** (4.0 equiv), Cu (50 mol%), K<sub>2</sub>CO<sub>3</sub> (5.0 equiv), and *o*-DCB (3.0 mL). The reaction mixture was allowed to stir for 5 min at room temperature under an N<sub>2</sub> atmosphere, and then heated at 180 °C in a pre-heated oil bath for 36 h. The reaction mixture was then cooled to room temperature, filtered through a short column of silica gel, and washed with DCM. The combined organic extracts were concentrated under reduced pressure to provide **14** and used in next step without further purification.

### Synthesis of QAO

A round bottom flask with a magnetic stirring bar was charged with **14** (1.0 mmol, 1.0 equiv), NaOH (20.0 equiv), and EtOH/H<sub>2</sub>O = 1/1 (10.0 mL). The reaction mixture was heated at 100 °C in a pre-heated oil bath for 24 h. The reaction mixture was then cooled to room temperature, and volatile was evaporated under reduced pressure. The remaining solid was dissolved in 20.0 mL of H<sub>2</sub>O, and acidified with 1 M HCl (aq). The resulting mixture was extracted with ethyl acetate (3 × 10.0 mL) and the combined organic layers were dried over anhydrous Na<sub>2</sub>SO<sub>4</sub>. After filtration, the solvent was evaporated under reduced pressure. Then the residue was dissolved in 10.0 mL of DCM and 5 drops of DMF was added. The reaction mixture was allowed to stir for 5 min at room temperature, and then oxalyl chloride (10.0 equiv) was added in drops. The reaction mixture was stirred for 5 min at room temperature, and oxalyl chloride (10.0 equiv) was added in drops. After being stirred for 1 h, the reaction mixture was added with AlCl<sub>3</sub> (20.0 equiv) and refluxed for 24 h. Then the resulting mixture was extracted with DCM (3 × 10.0 mL). The combined organic layers were

dried over anhydrous Na<sub>2</sub>SO<sub>4</sub>. After filtration, the solvent was evaporated under reduced pressure and the residue was purified *via* silica gel column chromatography (petroleum ether/DCM/ethyl acetate = 4/2/1, v/v/v) to afford the desired product **QAO** as a yellow solid (236.8 mg, 74% yield). The single crystal of **QAO** for X-ray crystallography was obtained by temperature gradient vacuum sublimation process. <sup>1</sup>H NMR (400 MHz, CDCl<sub>3</sub>): δ = 7.47 (t, *J* = 7.2 Hz, 2H), 7.63 (t, *J* = 7.6 Hz, 1H), 7.68 (t, *J* = 7.2 Hz, 2H), 8.11 (d, *J* = 4.4 Hz, 2H), 8.46 (d, *J* = 6.4 Hz, 2H), 8.71 (d, *J* = 7.6 Hz, 2H) ppm. <sup>13</sup>C NMR (100 MHz, CDCl<sub>3</sub>): δ = 120.4, 123.5, 123.7, 125.3, 126.5, 127.9, 132.8, 133.0, 139.3, 139.8, 178.7 ppm. HRMS (ESI<sup>+</sup>): calcd for C<sub>20</sub>H<sub>11</sub>NNaO<sub>2</sub> [M+Na]<sup>+</sup> 320.0682, found 320.0686.

#### IV. Method of Theoretical Calculations

All theoretical calculations were performed using Gaussian 09 serials software. The HOMO/LUMO distributions were calculated on the basis of crystal structures at the B3LYP/ 6-31g(d) level and visualized using Gaussview 5.0 software.

The singlet radiative decay rate ( $k_R^S$ ), the intersystem crossing rate ( $k_{ISC}$ ), the reverse intersystem crossing rate ( $k_{RISC}$ ) and the triplet non-radiative decay rate ( $k_{NR}^T$ ) could be estimated using the following equations.<sup>3,4</sup>

$$\Phi_P = C_1 \Phi_{PL}$$

$$\Phi_d = C_2 \Phi_{PL}$$

$$k_R^S = \Phi_P / \tau_p = \Phi_{PL} C_1 / \tau_p$$

$$k_{ISC} = (1 - \Phi_P) / \tau_p = (1 - \Phi_{PL} C_1) / \tau_p$$

$$k_{RISC} = \Phi_d / (k_{ISC} \tau_p \tau_d \Phi_P) = C_2 / [C_1 \tau_d (1 - \Phi_{PL} C_1)]$$

$$k_{NR}^T = 1 / \tau_d - \Phi_P k_{RISC} = (1 - \Phi_{PL}) / [\tau_d (1 - \Phi_{PL} C_1)]$$

Where  $\Phi_p$  and  $\Phi_d$  represent prompt and delayed fluorescence components and can be distinguished from the total  $\Phi_{PL}$  by comparing the integrated intensities of prompt ( $C_1$ ) and delayed components ( $C_2$ ) in the transient PL spectra.

## V. Crystal data

**Table S1. Crystal Data for 6 [CCDC 2249621]**

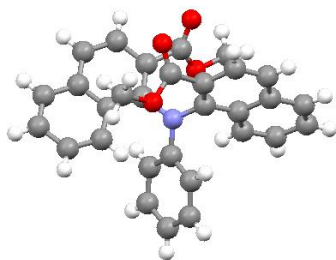

|                                             |                                                                                                         |
|---------------------------------------------|---------------------------------------------------------------------------------------------------------|
| Identification code                         | <b>6</b>                                                                                                |
| Empirical formula                           | C <sub>30</sub> H <sub>23</sub> NO <sub>4</sub>                                                         |
| Formula weight                              | 461.49                                                                                                  |
| Temperature/K                               | 197.0                                                                                                   |
| Crystal system                              | monoclinic                                                                                              |
| Space group                                 | C2/c                                                                                                    |
| Unit cell dimensions                        | a = 14.7721(8) Å, α = 90 deg.<br>b = 14.0494(8) Å, β = 120.406(3) deg.<br>c = 12.9393(7) Å, γ = 90 deg. |
| Volume                                      | 2316.1(2) Å <sup>3</sup>                                                                                |
| Z                                           | 4                                                                                                       |
| ρ <sub>calc</sub> /mg/mm <sup>3</sup>       | 1.324                                                                                                   |
| μ/mm <sup>-1</sup>                          | 0.088                                                                                                   |
| F(000)                                      | 968.0                                                                                                   |
| Crystal size/mm <sup>3</sup>                | 0.41 × 0.3 × 0.21                                                                                       |
| Radiation                                   | Mo Kα (λ = 0.71073)                                                                                     |
| 2θ range for data collection                | 4.316 to 55.042°                                                                                        |
| Index ranges                                | -19 ≤ h ≤ 19, -18 ≤ k ≤ 18, -16 ≤ l ≤ 16                                                                |
| Reflections collected                       | 27302                                                                                                   |
| Independent reflections                     | 2655 [R <sub>int</sub> = 0.0638, R <sub>sigma</sub> = 0.0329]                                           |
| Data/restraints/parameters                  | 2655/0/161                                                                                              |
| Goodness-of-fit on F <sup>2</sup>           | 1.048                                                                                                   |
| Final R indexes [I >= 2σ (I)]               | R <sub>1</sub> = 0.0392, wR <sub>2</sub> = 0.0939                                                       |
| Final R indexes [all data]                  | R <sub>1</sub> = 0.0586, wR <sub>2</sub> = 0.1024                                                       |
| Largest diff. peak/hole / e Å <sup>-3</sup> | 0.17/-0.19                                                                                              |

**Table S2. Crystal Data for *pe*-QAO [CCDC 2249111]**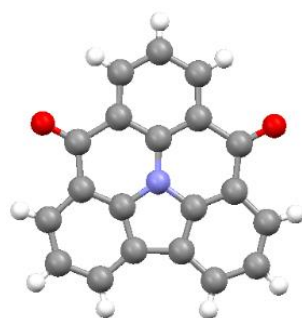

|                                             |                                                                                                  |
|---------------------------------------------|--------------------------------------------------------------------------------------------------|
| Identification code                         | <b><i>pe</i>-QAO</b>                                                                             |
| Empirical formula                           | C <sub>20</sub> H <sub>9</sub> NO <sub>2</sub>                                                   |
| Formula weight                              | 295.28                                                                                           |
| Temperature/K                               | 273.15                                                                                           |
| Crystal system                              | orthorhombic                                                                                     |
| Space group                                 | P2 <sub>1</sub> 2 <sub>1</sub> 2 <sub>1</sub>                                                    |
| Unit cell dimensions                        | a = 3.7973(3) Å, α = 90 deg.<br>b = 17.7163(14) Å, β = 90 deg.<br>c = 19.1364(15) Å, γ = 90 deg. |
| Volume                                      | 1287.38(18) Å <sup>3</sup>                                                                       |
| Z                                           | 4                                                                                                |
| ρ <sub>calc</sub> /mg/mm <sup>3</sup>       | 1.523                                                                                            |
| μ/mm <sup>-1</sup>                          | 0.099                                                                                            |
| F(000)                                      | 608.0                                                                                            |
| Crystal size/mm <sup>3</sup>                | 0.23 × 0.06 × 0.06                                                                               |
| Radiation                                   | Mo Kα (λ = 0.71073)                                                                              |
| 2θ range for data collection                | 4.256 to 55.088°                                                                                 |
| Index ranges                                | -4 ≤ h ≤ 4, -22 ≤ k ≤ 23, -24 ≤ l ≤ 24                                                           |
| Reflections collected                       | 7439                                                                                             |
| Independent reflections                     | 2840 [R <sub>int</sub> = 0.0758, R <sub>sigma</sub> = 0.0896]                                    |
| Data/restraints/parameters                  | 2840/0/208                                                                                       |
| Goodness-of-fit on F <sup>2</sup>           | 1.019                                                                                            |
| Final R indexes [I ≥ 2σ (I)]                | R <sub>1</sub> = 0.0590, wR <sub>2</sub> = 0.1039                                                |
| Final R indexes [all data]                  | R <sub>1</sub> = 0.1299, wR <sub>2</sub> = 0.1322                                                |
| Largest diff. peak/hole / e Å <sup>-3</sup> | 0.15/-0.21                                                                                       |

**Table S3. Crystal Data for QAO [CCDC 2248788]**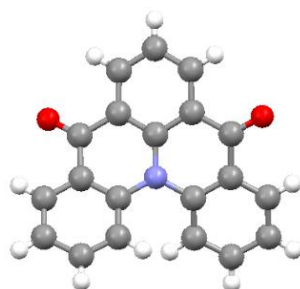

|                                                |                                                                                                                                                                                           |
|------------------------------------------------|-------------------------------------------------------------------------------------------------------------------------------------------------------------------------------------------|
| Identification code                            | <b>QAO</b>                                                                                                                                                                                |
| Empirical formula                              | $C_{20}H_{11}NO_2$                                                                                                                                                                        |
| Formula weight                                 | 297.30                                                                                                                                                                                    |
| Temperature/K                                  | 292.26(10)                                                                                                                                                                                |
| Crystal system                                 | monoclinic                                                                                                                                                                                |
| Space group                                    | $C2/c$                                                                                                                                                                                    |
| Unit cell dimensions                           | $a = 9.1959(6) \text{ \AA}$ , $\alpha = 90 \text{ deg.}$<br>$b = 13.4702(10) \text{ \AA}$ , $\beta = 91.216(5) \text{ deg.}$<br>$c = 10.7519(6) \text{ \AA}$ , $\gamma = 90 \text{ deg.}$ |
| Volume                                         | $1331.54(15) \text{ \AA}^3$                                                                                                                                                               |
| Z                                              | 4                                                                                                                                                                                         |
| $\rho_{\text{calc}}/\text{mm}^3$               | 1.483                                                                                                                                                                                     |
| $\mu/\text{mm}^{-1}$                           | 0.777                                                                                                                                                                                     |
| F(000)                                         | 616.0                                                                                                                                                                                     |
| Crystal size/ $\text{mm}^3$                    | $0.35 \times 0.3 \times 0.2$                                                                                                                                                              |
| Radiation                                      | Cu $K\alpha$ ( $\lambda = 1.54184$ )                                                                                                                                                      |
| $2\theta$ range for data collection            | $11.654$ to $143.472^\circ$                                                                                                                                                               |
| Index ranges                                   | $-10 \leq h \leq 11$ , $-15 \leq k \leq 16$ , $-13 \leq l \leq 10$                                                                                                                        |
| Reflections collected                          | 3083                                                                                                                                                                                      |
| Independent reflections                        | 1274 [ $R_{\text{int}} = 0.0286$ , $R_{\text{sigma}} = 0.0307$ ]                                                                                                                          |
| Data/restraints/parameters                     | 1274/0/106                                                                                                                                                                                |
| Goodness-of-fit on $F^2$                       | 1.080                                                                                                                                                                                     |
| Final R indexes [ $I \geq 2\sigma(I)$ ]        | $R_1 = 0.0719$ , $wR_2 = 0.1623$                                                                                                                                                          |
| Final R indexes [all data]                     | $R_1 = 0.0742$ , $wR_2 = 0.1673$                                                                                                                                                          |
| Largest diff. peak/hole / $e \text{ \AA}^{-3}$ | 0.47/−0.55                                                                                                                                                                                |

**Table S4. Crystal Data for [5]he-BQAO [CCDC 2248789]**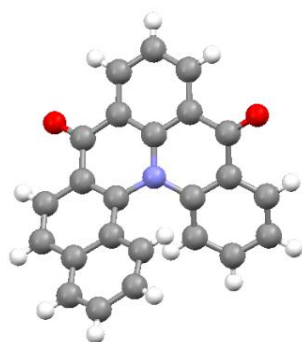

|                                             |                                                                                                                      |
|---------------------------------------------|----------------------------------------------------------------------------------------------------------------------|
| Identification code                         | <b>[5]he-BQAO</b>                                                                                                    |
| Empirical formula                           | C <sub>24</sub> H <sub>13</sub> NO <sub>2</sub>                                                                      |
| Formula weight                              | 347.35                                                                                                               |
| Temperature/K                               | 308.0                                                                                                                |
| Crystal system                              | triclinic                                                                                                            |
| Space group                                 | P-1                                                                                                                  |
| Unit cell dimensions                        | a = 8.0822(16) Å, α = 61.646(6) deg.<br>b = 11.0340(19) Å, β = 69.236(4) deg.<br>c = 11.143(2) Å, γ = 83.968(6) deg. |
| Volume                                      | 815.3(3) Å <sup>3</sup>                                                                                              |
| Z                                           | 2                                                                                                                    |
| ρ <sub>calc</sub> /mm <sup>3</sup>          | 1.415                                                                                                                |
| μ/mm <sup>-1</sup>                          | 0.090                                                                                                                |
| F(000)                                      | 360.0                                                                                                                |
| Crystal size/mm <sup>3</sup>                | 0.41 × 0.4 × 0.21                                                                                                    |
| Radiation                                   | Mo Kα (λ = 0.71073)                                                                                                  |
| 2θ range for data collection                | 4.208 to 54.962°                                                                                                     |
| Index ranges                                | -10 ≤ h ≤ 10, -14 ≤ k ≤ 14, -14 ≤ l ≤ 14                                                                             |
| Reflections collected                       | 22848                                                                                                                |
| Independent reflections                     | 3742 [R <sub>int</sub> = 0.0624, R <sub>sigma</sub> = 0.0465]                                                        |
| Data/restraints/parameters                  | 3742/0/244                                                                                                           |
| Goodness-of-fit on F <sup>2</sup>           | 1.030                                                                                                                |
| Final R indexes [I ≥ 2σ (I)]                | R <sub>1</sub> = 0.0429, wR <sub>2</sub> = 0.1031                                                                    |
| Final R indexes [all data]                  | R <sub>1</sub> = 0.0650, wR <sub>2</sub> = 0.1158                                                                    |
| Largest diff. peak/hole / e Å <sup>-3</sup> | 0.17/-0.17                                                                                                           |



**Table S5. Crystal Data for [6]he-BQAO [CCDC 2248790]**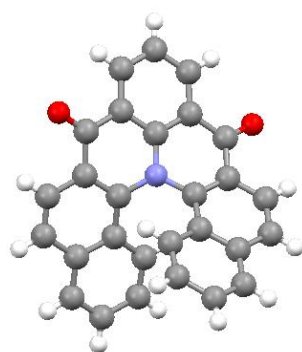

|                                             |                                                                                                        |
|---------------------------------------------|--------------------------------------------------------------------------------------------------------|
| Identification code                         | <b>[6]he-BQAO</b>                                                                                      |
| Empirical formula                           | C <sub>28</sub> H <sub>15</sub> NO <sub>2</sub>                                                        |
| Formula weight                              | 397.41                                                                                                 |
| Temperature/K                               | 293.9(2)                                                                                               |
| Crystal system                              | monoclinic                                                                                             |
| Space group                                 | I2/a                                                                                                   |
| Unit cell dimensions                        | a = 15.1670(4) Å, α = 90 deg.<br>b = 10.9238(4) Å, β = 94.397(3) deg.<br>c = 11.5354(4) Å, γ = 90 deg. |
| Volume                                      | 1905.56(10) Å <sup>3</sup>                                                                             |
| Z                                           | 4                                                                                                      |
| ρ <sub>calc</sub> /mm <sup>3</sup>          | 1.385                                                                                                  |
| μ/mm <sup>-1</sup>                          | 0.694                                                                                                  |
| F(000)                                      | 824.0                                                                                                  |
| Crystal size/mm <sup>3</sup>                | 0.6 × 0.5 × 0.3                                                                                        |
| Radiation                                   | Cu Kα (λ = 1.54184)                                                                                    |
| 2θ range for data collection                | 9.988 to 142.72°                                                                                       |
| Index ranges                                | -18 ≤ h ≤ 15, -10 ≤ k ≤ 13, -12 ≤ l ≤ 14                                                               |
| Reflections collected                       | 5024                                                                                                   |
| Independent reflections                     | 1823 [R <sub>int</sub> = 0.0347, R <sub>sigma</sub> = 0.0250]                                          |
| Data/restraints/parameters                  | 1823/0/142                                                                                             |
| Goodness-of-fit on F <sup>2</sup>           | 1.081                                                                                                  |
| Final R indexes [I ≥ 2σ (I)]                | R <sub>1</sub> = 0.0606, wR <sub>2</sub> = 0.1541                                                      |
| Final R indexes [all data]                  | R <sub>1</sub> = 0.0637, wR <sub>2</sub> = 0.1589                                                      |
| Largest diff. peak/hole / e Å <sup>-3</sup> | 0.24/-0.41                                                                                             |

**Table S6. Crystal Data for *hp*-BQAO [CCDC 2249112]**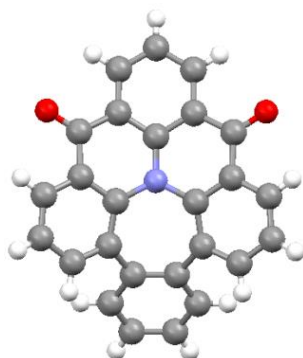

|                                             |                                                                                               |
|---------------------------------------------|-----------------------------------------------------------------------------------------------|
| Identification code                         | <b><i>hp</i>-BQAO</b>                                                                         |
| Empirical formula                           | C <sub>26</sub> H <sub>13</sub> NO <sub>2</sub>                                               |
| Formula weight                              | 371.37                                                                                        |
| Temperature/K                               | 200.0                                                                                         |
| Crystal system                              | orthorhombic                                                                                  |
| Space group                                 | Pmn2 <sub>1</sub>                                                                             |
| Unit cell dimensions                        | a = 16.208(4) Å, α = 90 deg.<br>b = 4.0870(10) Å, β = 90 deg.<br>c = 12.278(2) Å, γ = 90 deg. |
| Volume                                      | 813.3(3) Å <sup>3</sup>                                                                       |
| Z                                           | 2                                                                                             |
| ρ <sub>calc</sub> /mg/mm <sup>3</sup>       | 1.516                                                                                         |
| μ/mm <sup>-1</sup>                          | 0.096                                                                                         |
| F(000)                                      | 384.0                                                                                         |
| Crystal size/mm <sup>3</sup>                | 0.39 × 0.1 × 0.03                                                                             |
| Radiation                                   | Mo Kα (λ = 0.71073)                                                                           |
| 2θ range for data collection                | 4.162 to 55.042°                                                                              |
| Index ranges                                | -21 ≤ h ≤ 16, -4 ≤ k ≤ 5, -15 ≤ l ≤ 14                                                        |
| Reflections collected                       | 4870                                                                                          |
| Independent reflections                     | 1841 [R <sub>int</sub> = 0.0506, R <sub>sigma</sub> = 0.0556]                                 |
| Data/restraints/parameters                  | 1841/1/136                                                                                    |
| Goodness-of-fit on F <sup>2</sup>           | 1.059                                                                                         |
| Final R indexes [I ≥ 2σ (I)]                | R <sub>1</sub> = 0.0448, wR <sub>2</sub> = 0.0901                                             |
| Final R indexes [all data]                  | R <sub>1</sub> = 0.0632, wR <sub>2</sub> = 0.0994                                             |
| Largest diff. peak/hole / e Å <sup>-3</sup> | 0.19/-0.24                                                                                    |

## VI. Additional Spectra and Data

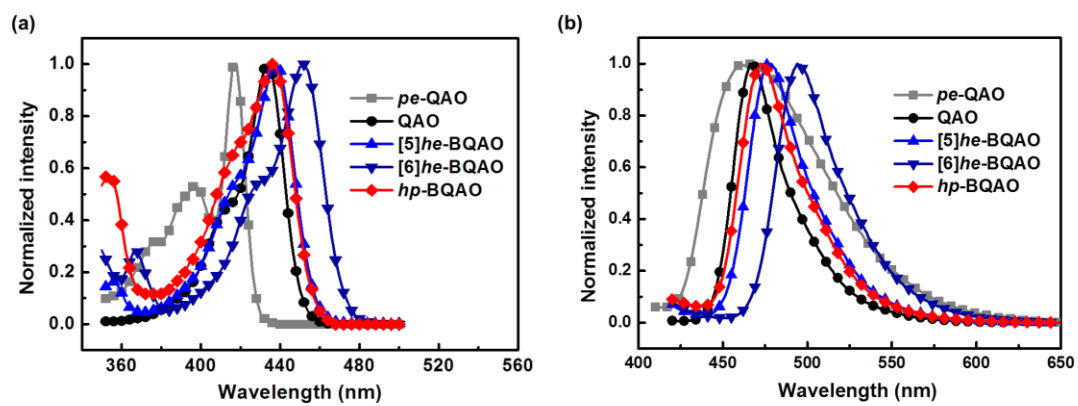

**Fig. S1.** (a) Absorption (Abs.) spectra at 298 K in toluene solutions at  $1.0 \times 10^{-5}$  M. (b) Photoluminescence spectra of the 3 wt% DCz-BTP host blended films at 298 K.

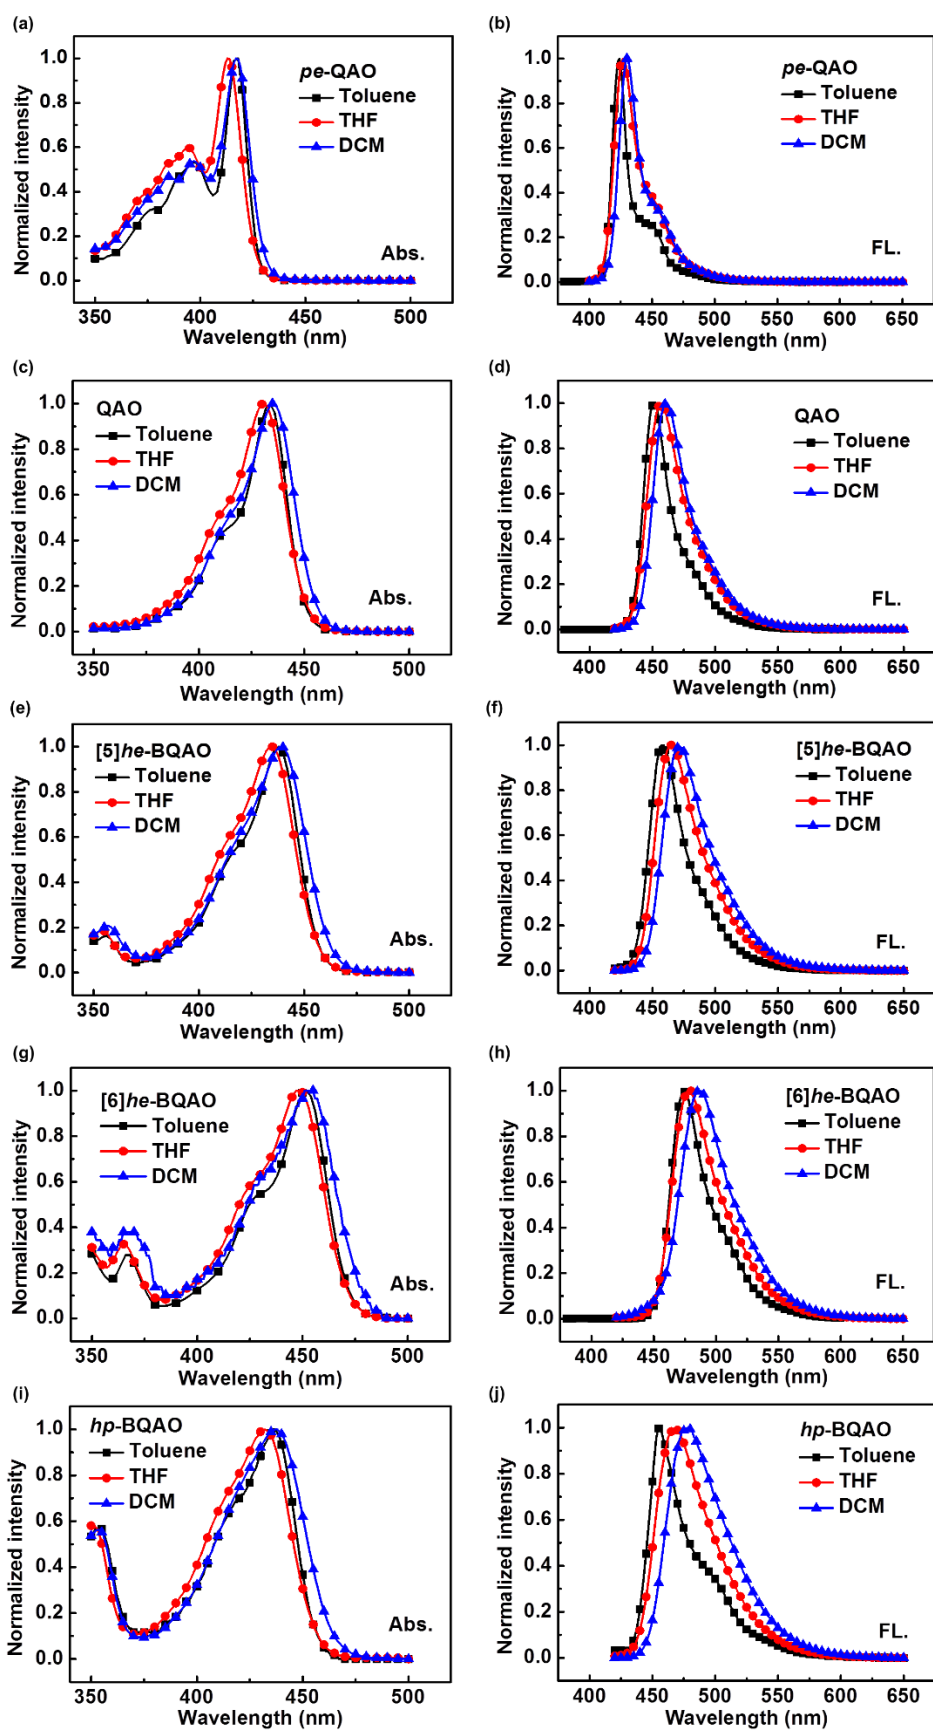

**Fig. S2.** Absorption spectra (Abs.) and fluorescence spectra (FL.) measured in the solvents with different polarities at 298 K.

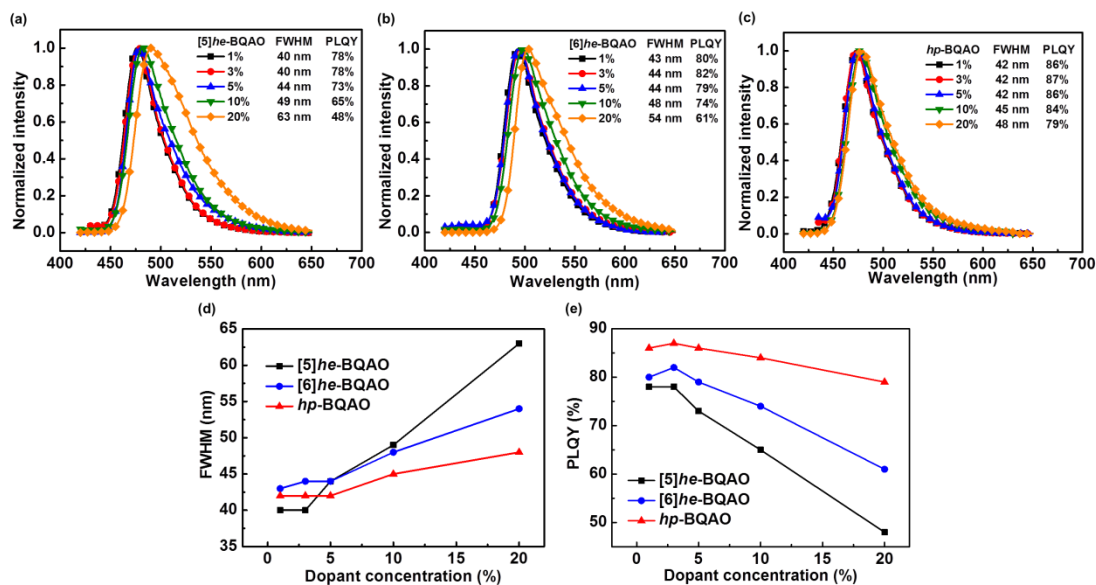

**Fig. S3.** Normalized photoluminescence spectra (PL), full-width at half-maximum (FWHM) and PL quantum yields (PLQY) of **[5]he-BQAO**, **[6]he-BQAO** and **hp-BQAO** doped in DCz-BTP films with different dopant concentrations of 1%, 3%, 5%, 10% and 20% at 298 K.

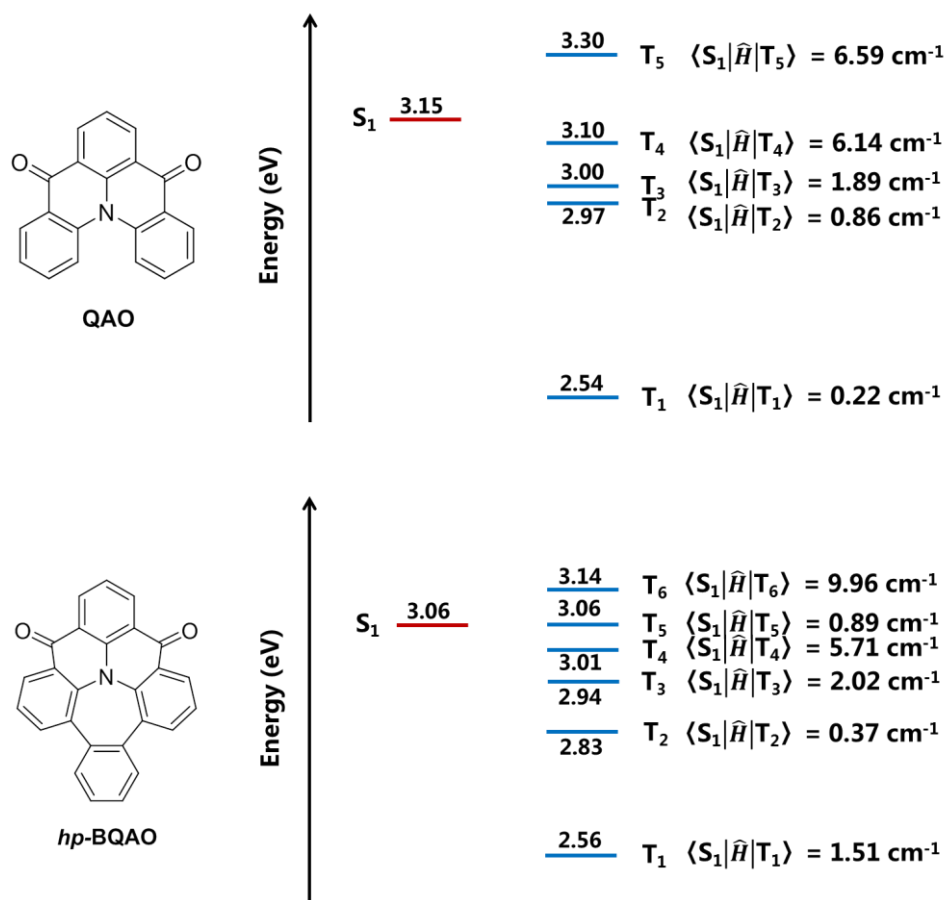

**Fig. S4.** Spin orbit coupling (SOC) analysis of **QAO** and **hp-BQAO**

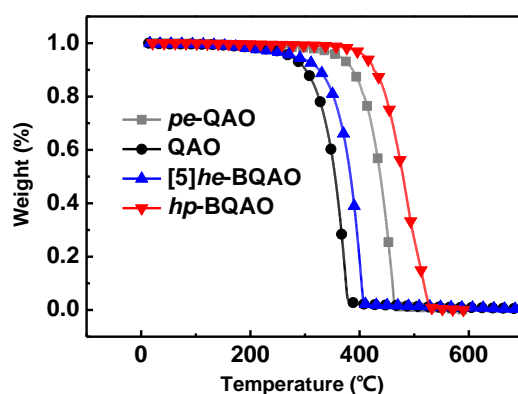

**Fig. S5.** TGA thermograms measured at a heating rate of 10 °C/min.

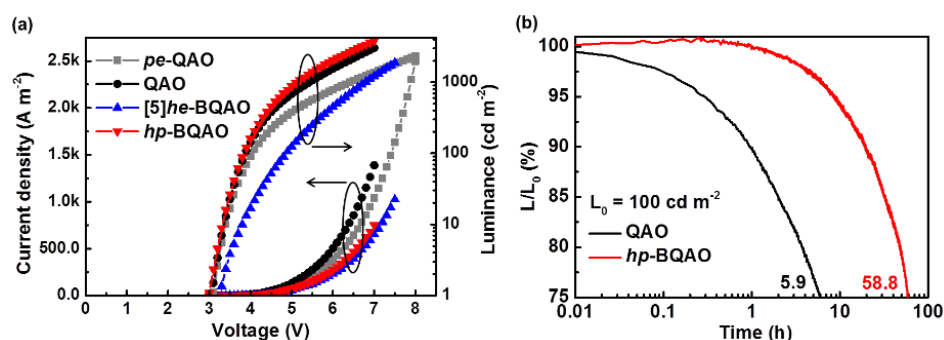

**Fig. S6.** (a) Current density-voltage-luminance curves of OLEDs. (b) Luminance ( $L$ )-deterioration curves of **QAO** and ***hp*-BQAO**-based OLEDs at the initial luminance ( $L_0$ ) of 100 cd m<sup>-2</sup>.

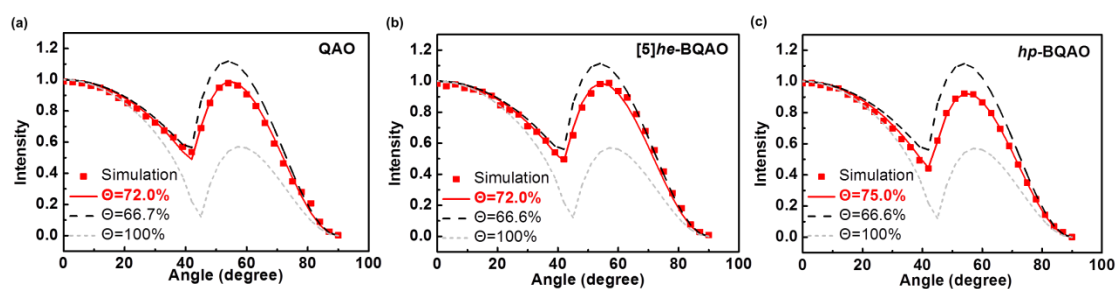

**Fig. S7.** Photoluminescence spectra intensity-emission angle curves with simulated horizontal dipole ratios ( $\Theta$ ) values in (a) **QAO**, (b) **[5]*he*-BQAO** and (c) ***hp*-BQAO**-doped DCz-BTP films (3 wt%).

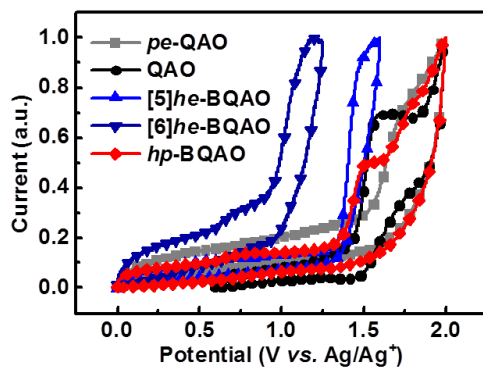

**Fig. S8.** Cyclic voltammograms measured in dry DCM containing 0.1 M of  $\text{Bu}_4\text{NPF}_6$ .

**Table S7.** Summary of photoluminescence spectra data in different polar solvents.

| Compound          | In toluene                    |              | In THF                        |              | In DCM                        |              |
|-------------------|-------------------------------|--------------|-------------------------------|--------------|-------------------------------|--------------|
|                   | $\lambda_{\text{em}}$<br>[nm] | FWHM<br>[nm] | $\lambda_{\text{em}}$<br>[nm] | FWHM<br>[nm] | $\lambda_{\text{em}}$<br>[nm] | FWHM<br>[nm] |
| <b>Pe-QAO</b>     | 424                           | 13           | 427                           | 22           | 430                           | 19           |
| <b>QAO</b>        | 452                           | 25           | 458                           | 34           | 461                           | 33           |
| <b>[5]he-BQAO</b> | 458                           | 32           | 465                           | 41           | 471                           | 43           |
| <b>[6]he-BQAO</b> | 474                           | 34           | 477                           | 44           | 486                           | 46           |
| <b>hp-BQAO</b>    | 456                           | 34           | 469                           | 50           | 478                           | 53           |

**Table S8.** Summary of molecular structures, photophysical properties and OLED performances for blue N-CO MR-emitters.

### 1. Molecular structures

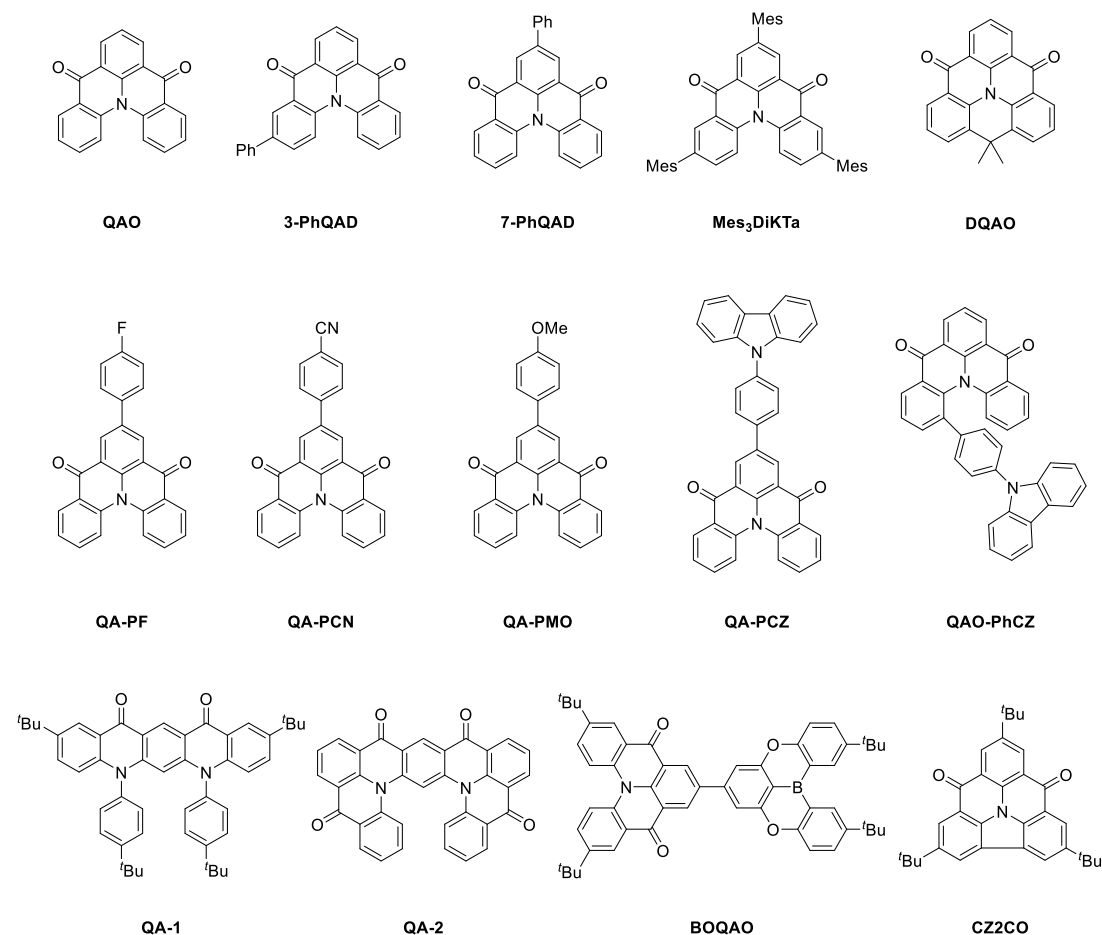

### 2. Photophysical properties and OLED performances

| Emitters               | In solution            |              |                    | In film                           |                                      | In device                  |              |            | Ref.      |
|------------------------|------------------------|--------------|--------------------|-----------------------------------|--------------------------------------|----------------------------|--------------|------------|-----------|
|                        | $\lambda_{em}$<br>[nm] | FWHM<br>[nm] | $\Phi_{PL}$<br>[%] | $k_R^S$<br>[ $10^7$<br>$s^{-1}$ ] | $k_{RISC}$<br>[ $10^4$<br>$s^{-1}$ ] | EL <sub>peak</sub><br>[nm] | FWHM<br>[nm] | EQE<br>[%] |           |
| <i>hp</i> -BQAO        | 456                    | 34           | 87                 | 6.8                               | 25.4                                 | 471                        | 41           | 24.1       | This work |
| QAO                    | 466                    | 32           | 72                 | -                                 | -                                    | 468                        | 39           | 19.4       | 5         |
| 3-PhQAD                | 466                    | 30           | 73                 | 4.0                               | 1.2                                  | 480                        | 44           | 19.1       | 6         |
| 7-PhQAD                | 464                    | 22           | 68                 | 3.6                               | 0.6                                  | 472                        | 34           | 18.7       | 6         |
| Mes <sub>3</sub> DiKTa | 468                    | 29           | 80                 | 5.4 <sup>a</sup>                  | 3.1 <sup>a</sup>                     | 480                        | 36           | 21.1       | 2         |



|          |     |    |    |     |      |                      |                    |                        |    |
|----------|-----|----|----|-----|------|----------------------|--------------------|------------------------|----|
| DQAO     | 465 | 33 | 59 | -   | -    | 472                  | 34                 | 15.2                   | 7  |
| QA-PF    | 465 | 23 |    |     | 4.9  | 474                  | 27                 | 16.8                   | 8  |
| QA-PCN   | 462 | 25 |    |     | 16.1 | 473                  | 30                 | 16.9                   | 8  |
| QA-PMO   | 475 | 27 |    |     | 2.2  | 484                  | 27                 | 15.0                   | 8  |
| QA-PCZ   | 471 | 29 | 89 | 9.6 | 5.0  | 482                  | 29                 | 17.5                   | 8  |
| QAO-PhCZ | 461 | 29 | 68 | 4.3 | -    | 467                  | 36                 | 14.0                   | 9  |
| QA-1     | 434 | 31 | 66 | 8.6 | 1.5  | 455                  | 49                 | 17.1                   | 10 |
| QA-2     | 444 | 22 | 97 | 1.5 | 85.0 | 463                  | 37                 | 19.0                   | 10 |
| BOQAO    | 474 | 28 | 99 | 3.2 | 2.4  | 484                  | 32                 | 21.8                   | 11 |
| CZ2CO    | 440 | 16 | 84 | -   | -    | 445/445 <sup>b</sup> | 23/26 <sup>b</sup> | 13.0/25.6 <sup>b</sup> | 1  |

<sup>a</sup> Measured in solution. <sup>b</sup> With TADF sensitizers.

## VII. References

- [1] C. Cao, J.-H. Tan, Z.-L. Zhu, J.-D. Lin, H.-J. Tan, H. Chen, Y. Yuan, M.-K. Tse, W.-C. Chen, C.-S. Lee, *Angew. Chem. Int. Ed.* **2023**, *62*, e202215226.
- [2] D. Hall, S. M. Suresh, P. L. dos Santos, E. Duda, S. Bagnich, A. Pershin, P. Rajamalli, D. B. Cordes, A. M. Z. Slawin, D. Beljonne, A. Köhler, I. D. W. Samuel, Y. Olivier, E. Zysman-Colman, *Adv. Optical Mater.* **2020**, *8*, 1901627.
- [3] B. Lei, Z. Huang, S. Li, J. Liu, Z. Bin, J. You, *Angew. Chem. Int. Ed.* **2023**, *62*, e202218405.
- [4] (a) K. Masui, H. Nakanotani, C. Adachi, *Org. Electron.* **2013**, *14*, 2721; (b) Y. Liu, X. Xiao, D. Yang, D. Ma, J. Liu, B. Lei, Z. Bin, J. You, *Angew. Chem. Int. Ed.* **2022**, *61*, e202210210.
- [5] Y. Yuan, X. Tang, X.-Y. Du, Y. Hu, Y.-J. Yu, Z.-Q. Jiang, L.-S. Liao, S.-T. Lee. *Adv. Optical Mater.* **2019**, *7*, 1801536.
- [6] X. Li, Y.-Z. Shi, K. Wang, M. Zhang, C.-J. Zheng, D.-M. Sun, G.-L. Dai, X.-C. Fan, D.-Q. Wang, W. Liu, Y.-Q. Li, J. Yu, X.-M. Ou, C. Adachi, X.-H. Zhang, *ACS Appl. Mater. Interfaces* **2019**, *11*, 13472.
- [7] S.-N. Zou, C.-C. Peng, S.-Y. Yang, Y.-K. Qu, Y.-J. Yu, X. Chen, Z.-Q. Jiang, L.-S. Liao, *Org. Lett.* **2021**, *23*, 958.
- [8] X. Qiu, G. Tian, C. Lin, Y. Pan, X. Ye, B. Wang, D. Ma, D. Hu, Y. Luo, Y. Ma, *Adv. Optical Mater.* **2021**, *9*, 2001845.
- [9] S.-Y. Yang, S.-N. Zou, F.-C. Kong, X.-J. Liao, Y.-K. Qu, Z.-Q. Feng, Y.-X.

Zheng, Z.-Q. Jiang, L.-S. Liao, *Chem. Commun.* **2021**, 57, 11041.

[10] H. Min, I. S. Park, T. Yasuda, *Angew. Chem. Int. Ed.* **2021**, 60, 7643.

[11] Y.-J. Yu, S.-N. Zou, C.-C. Peng, Z.-Q. Feng, Y.-K. Qu, S.-Y. Yang, Z.-Q. Jiang, L.-S. Liao, *J. Mater. Chem. C* **2022**, 10, 4941.

## VIII. Copies of $^1\text{H}$ and $^{13}\text{C}$ NMR spectra

$^1\text{H}$  NMR spectrum of **3** ( $\text{CDCl}_3$ )

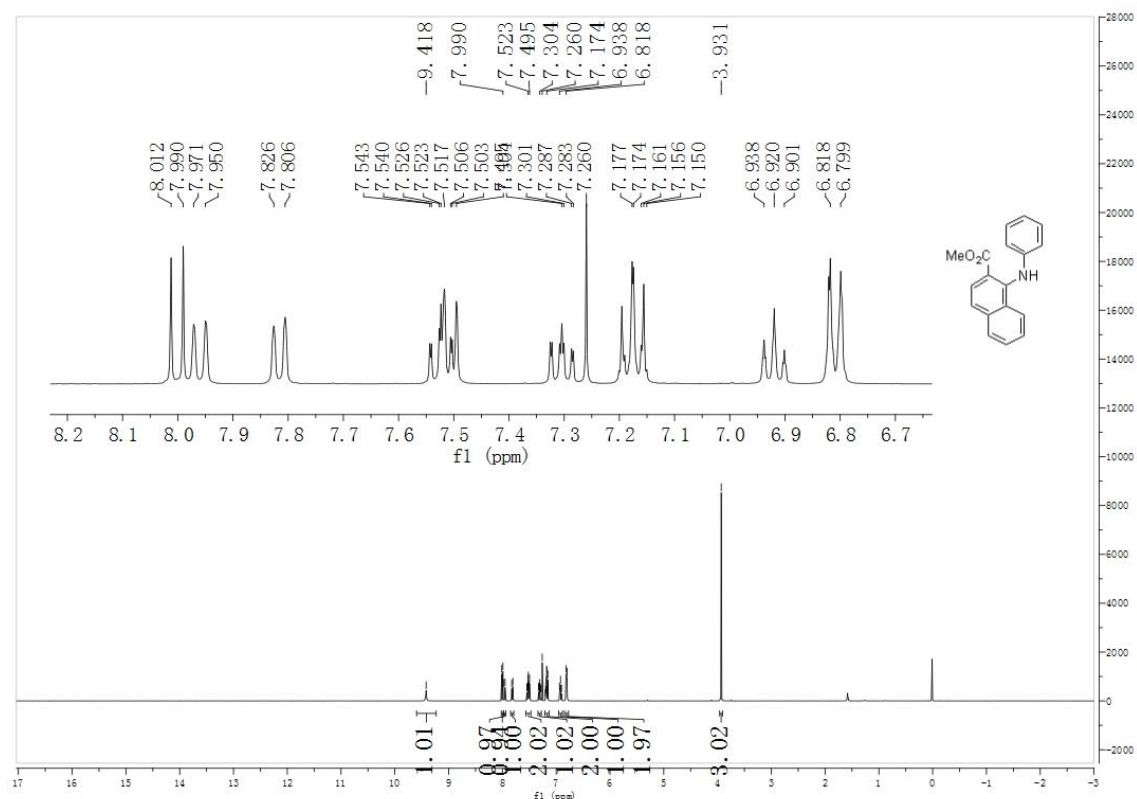

$^{13}\text{C}$  NMR spectrum of **3** ( $\text{CDCl}_3$ )

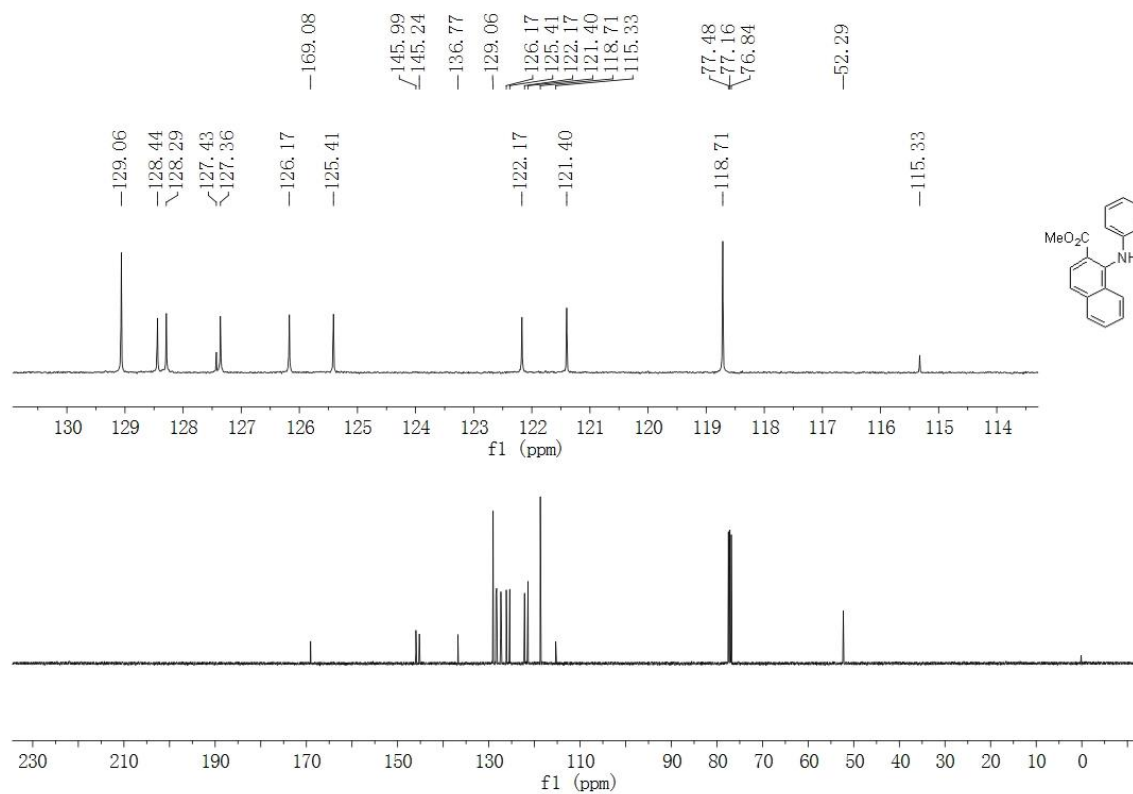

<sup>1</sup>H NMR spectrum of **5** (CDCl<sub>3</sub>)

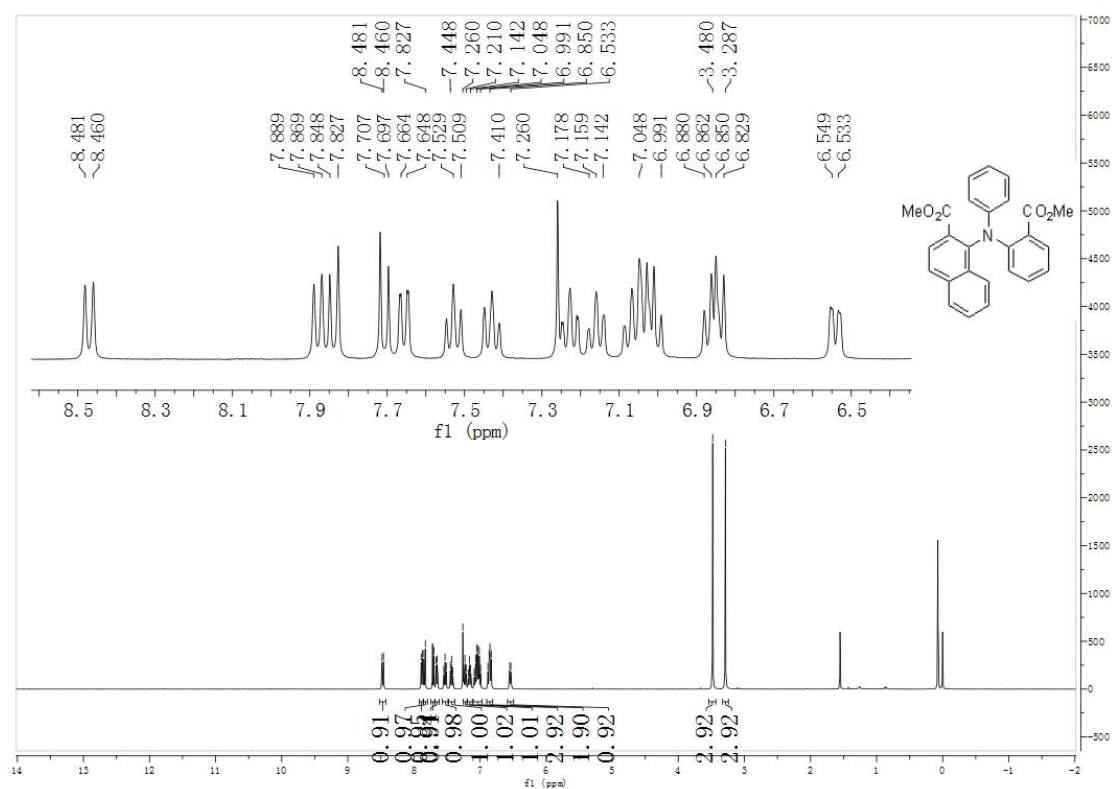

<sup>13</sup>C NMR spectrum of **5** (CDCl<sub>3</sub>)

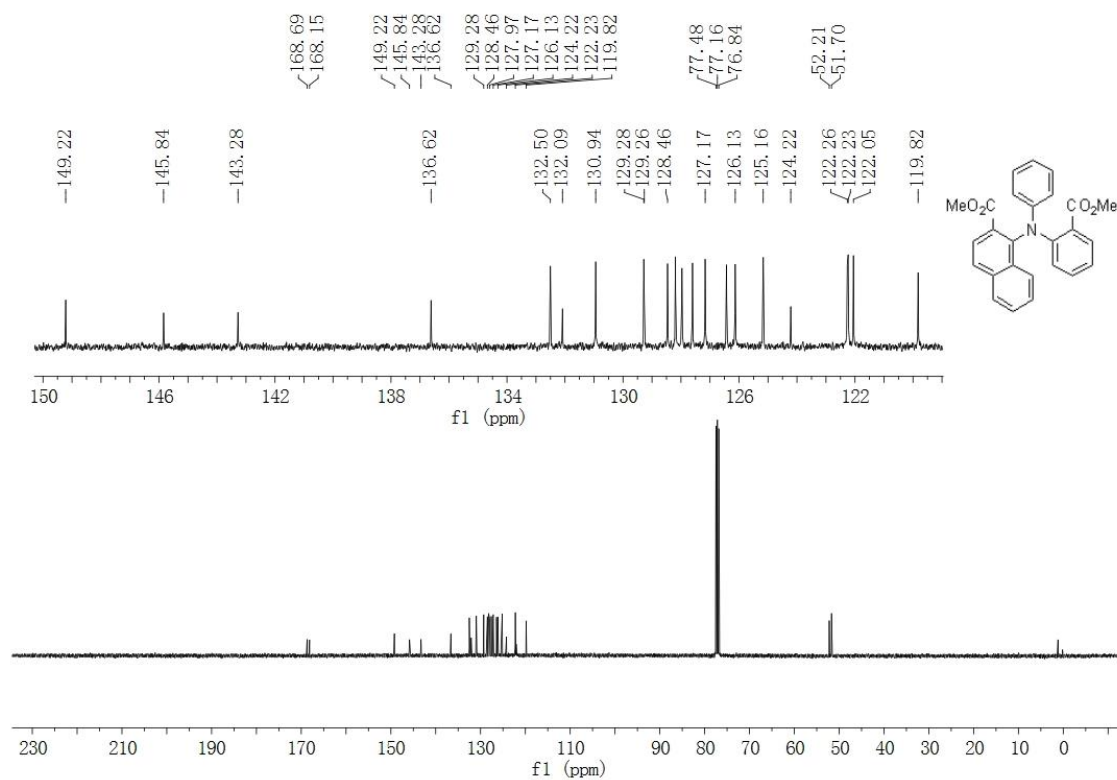

<sup>1</sup>H NMR spectrum of **6** (CDCl<sub>3</sub>)

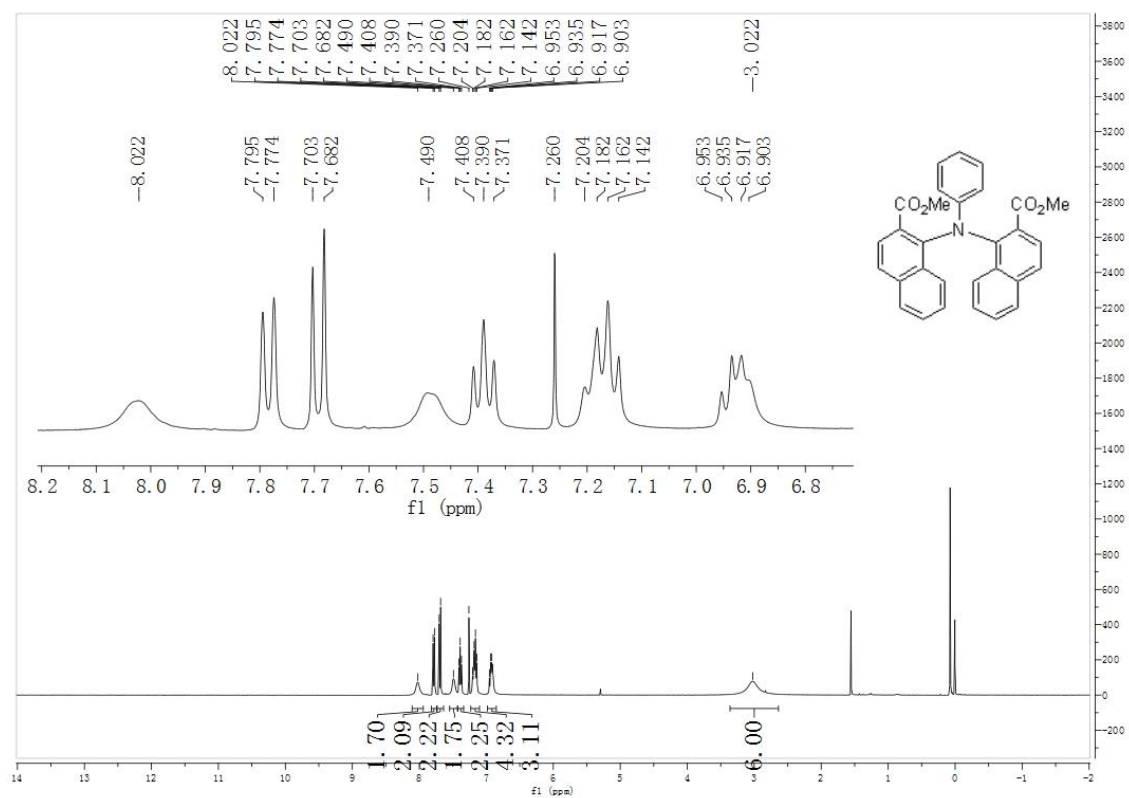

<sup>13</sup>C NMR spectrum of **6** (CDCl<sub>3</sub>)

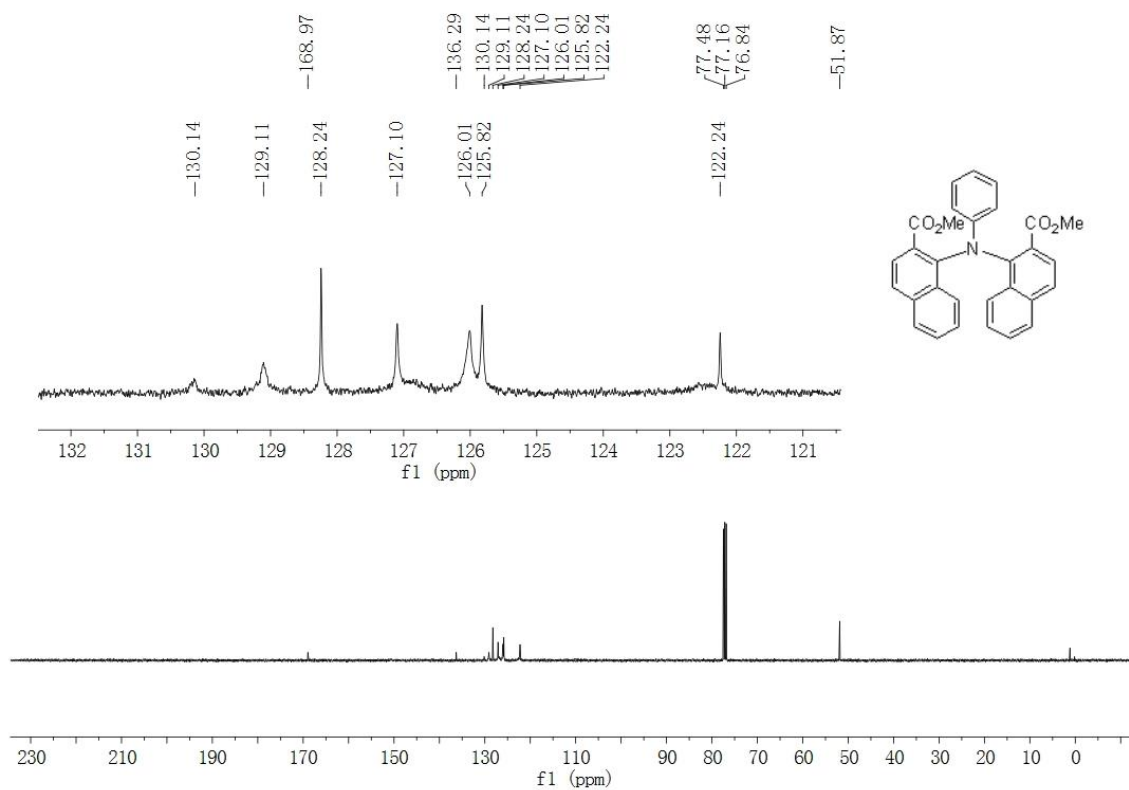



<sup>1</sup>H NMR spectrum of [6]he-BQAO (CDCl<sub>3</sub>)

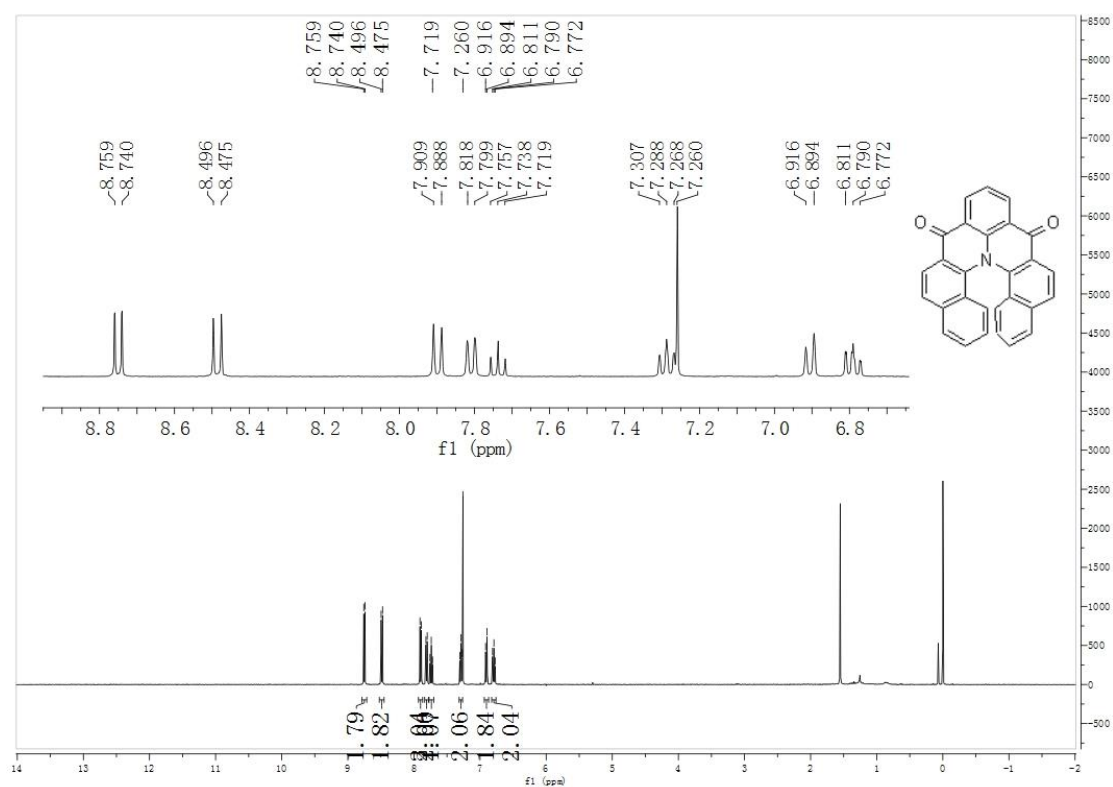

<sup>13</sup>C NMR spectrum of [6]he-BQAO (CDCl<sub>3</sub>)

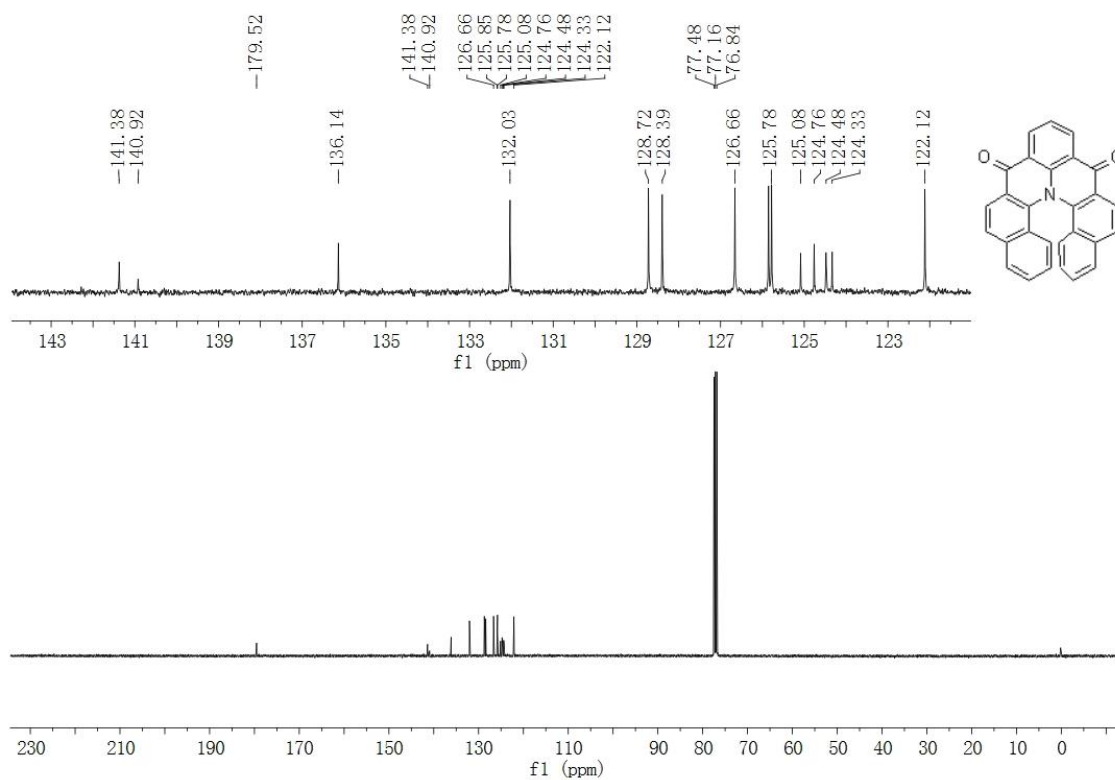

<sup>1</sup>H NMR spectrum of **9** (CDCl<sub>3</sub>)

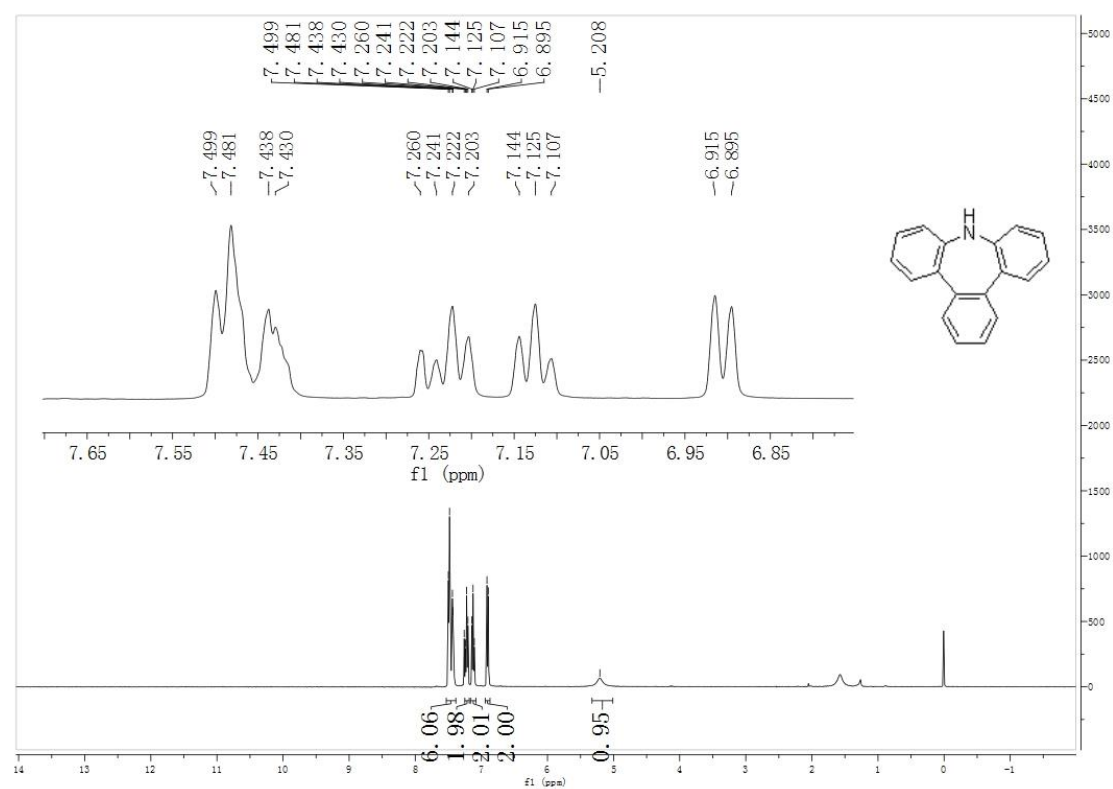

<sup>13</sup>C NMR spectrum of **9** (CDCl<sub>3</sub>)

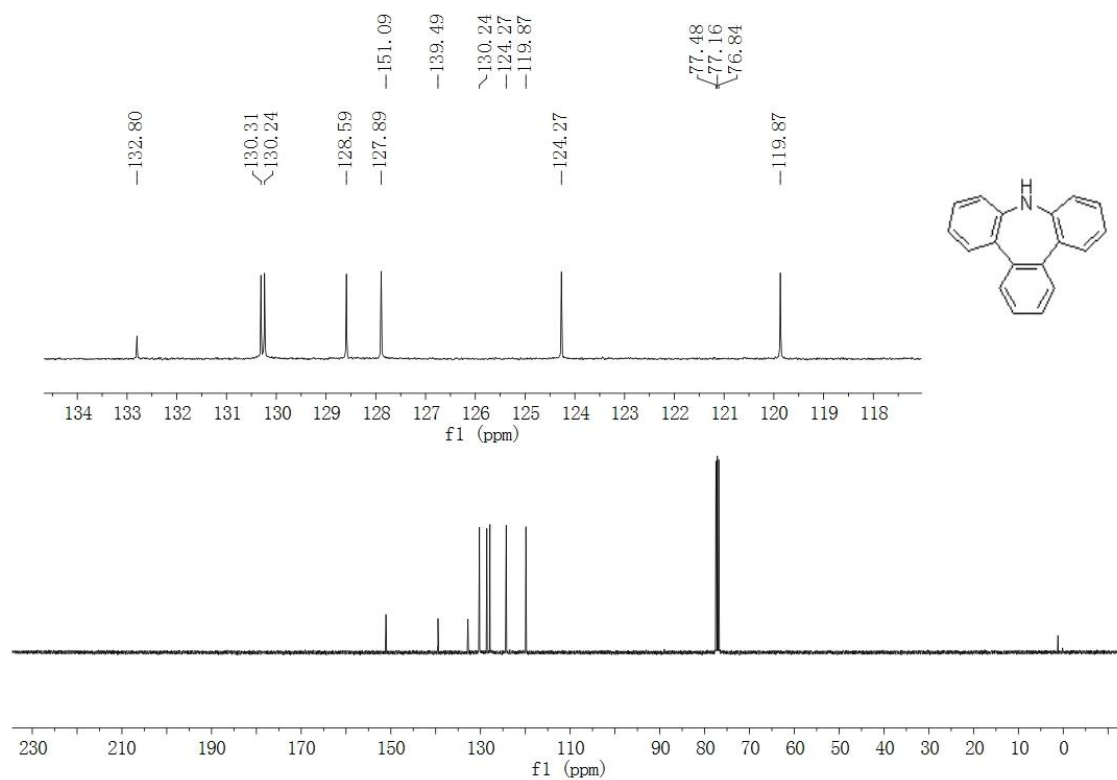



<sup>1</sup>H NMR spectrum of **11** (DMSO-*d*<sub>6</sub>)

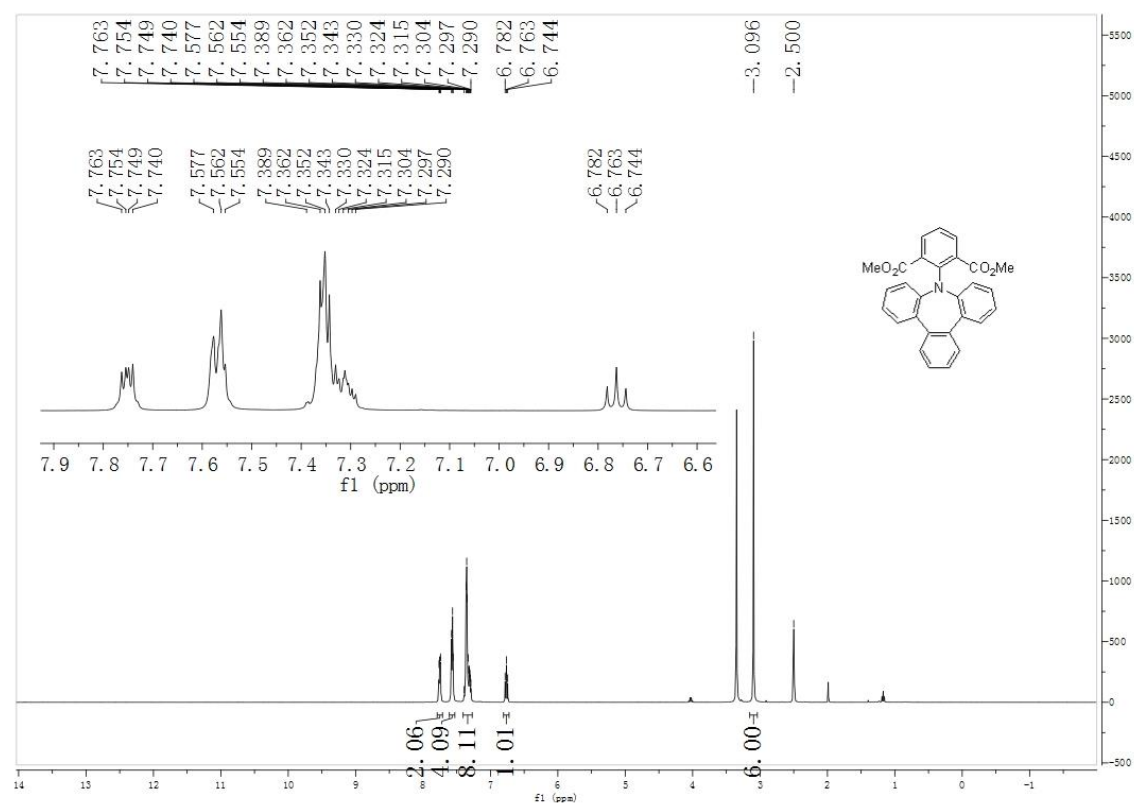

<sup>13</sup>C NMR spectrum of **11** (DMSO-*d*<sub>6</sub>)

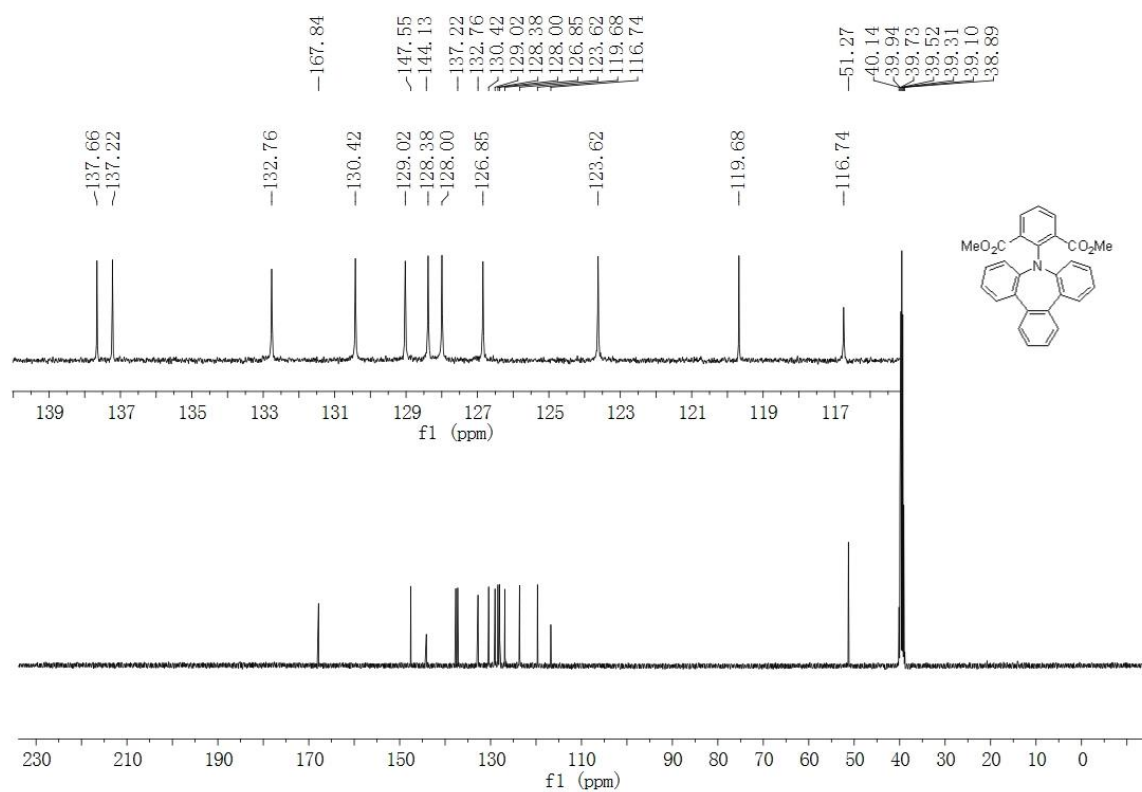

<sup>1</sup>H NMR spectrum of *hp*-BQAO (CDCl<sub>3</sub>)

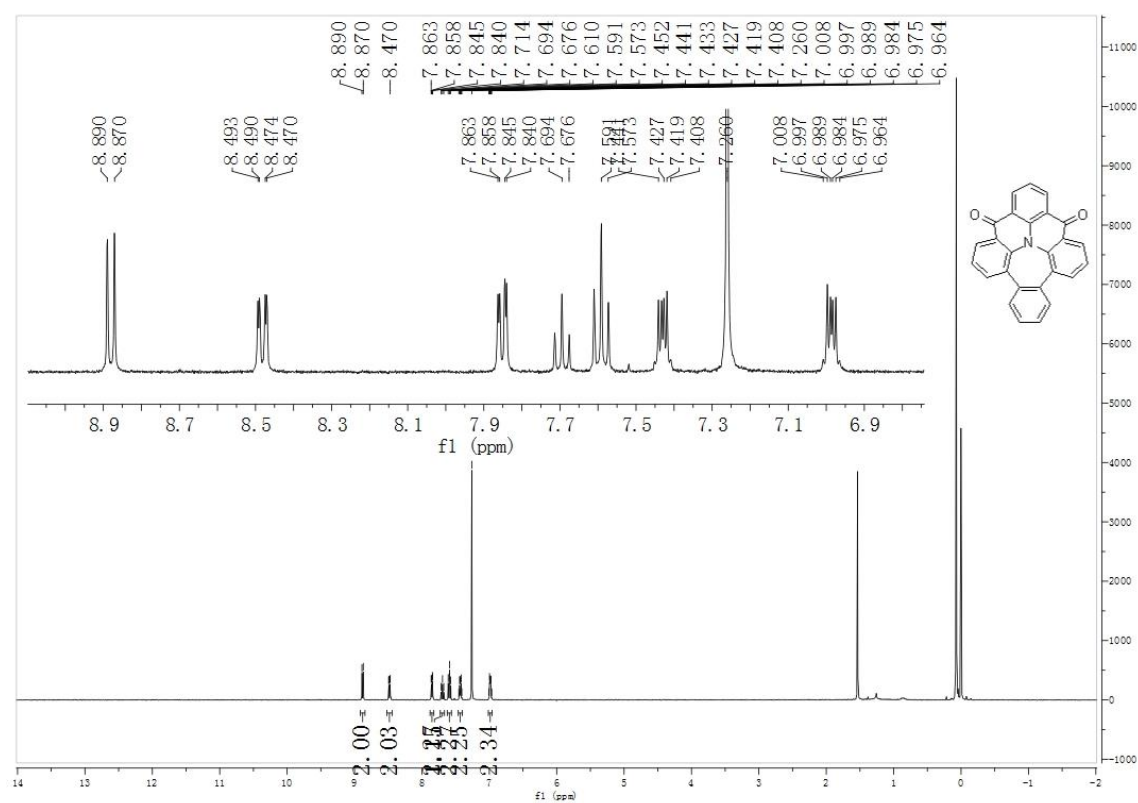

<sup>13</sup>C NMR spectrum of *hp*-BQAO (CDCl<sub>3</sub>)

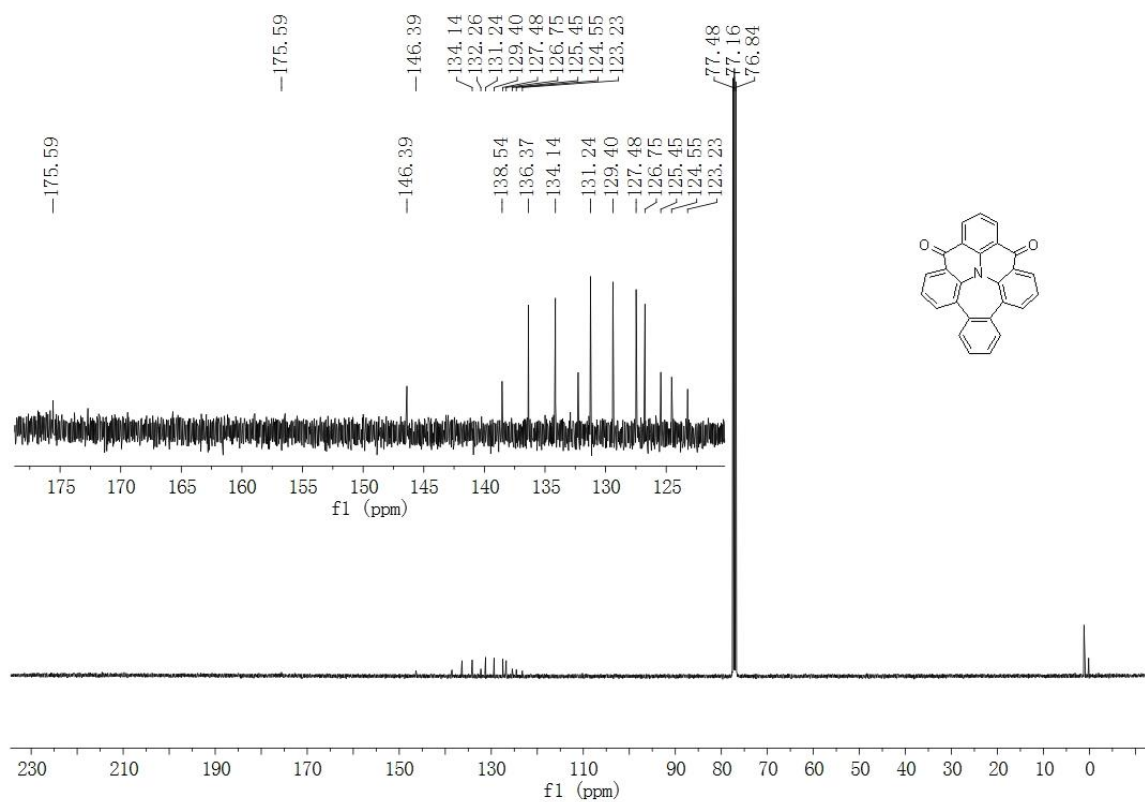

<sup>1</sup>H NMR spectrum of *pe*-QAO (CDCl<sub>3</sub>)

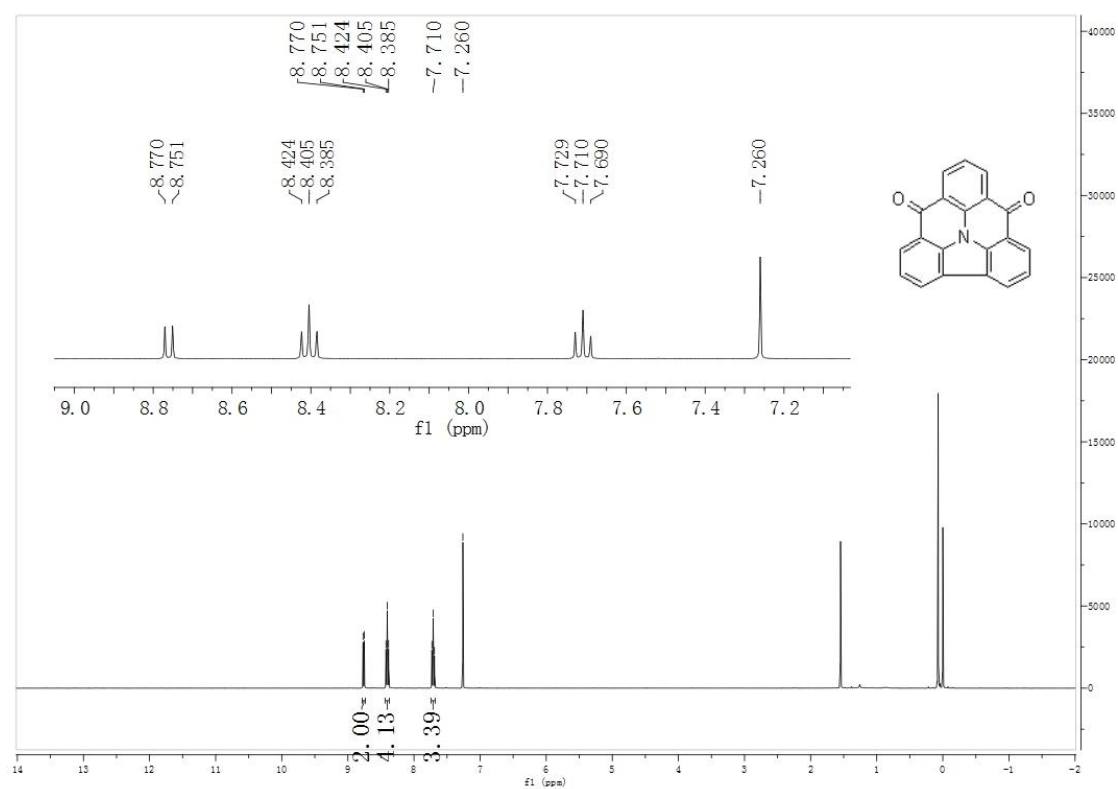

<sup>13</sup>C NMR spectrum of *pe*-QAO (CDCl<sub>3</sub>)

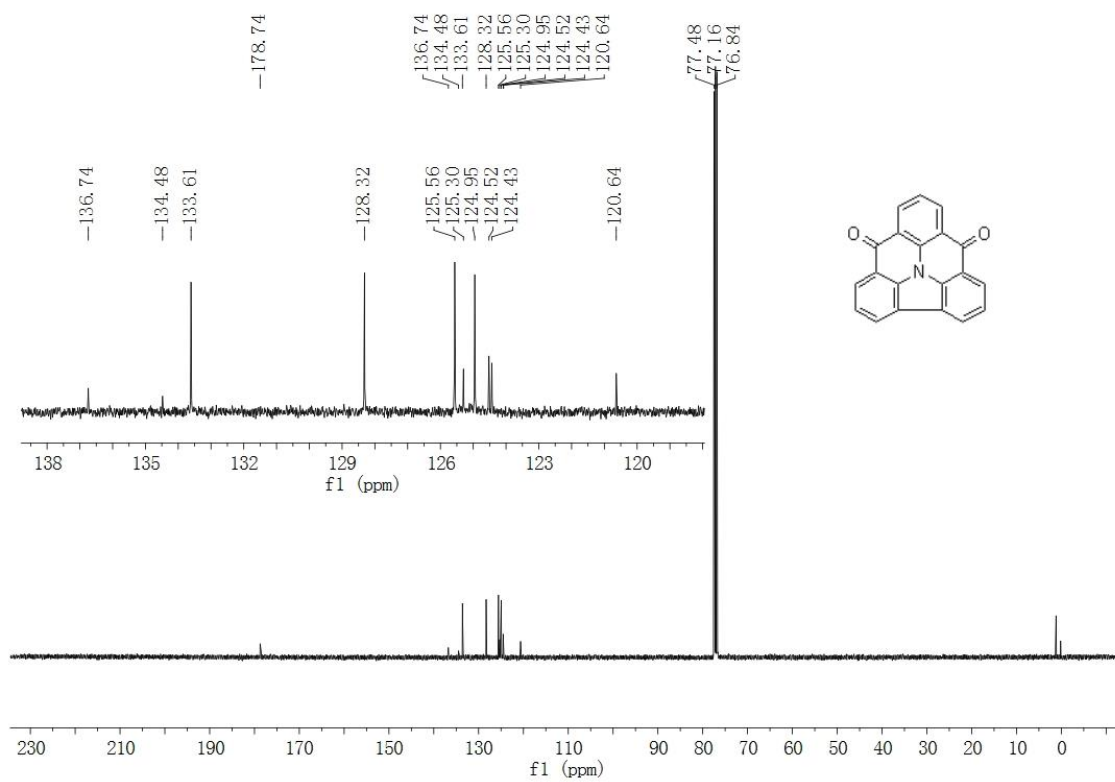

<sup>1</sup>H NMR spectrum of QAO (CDCl<sub>3</sub>)

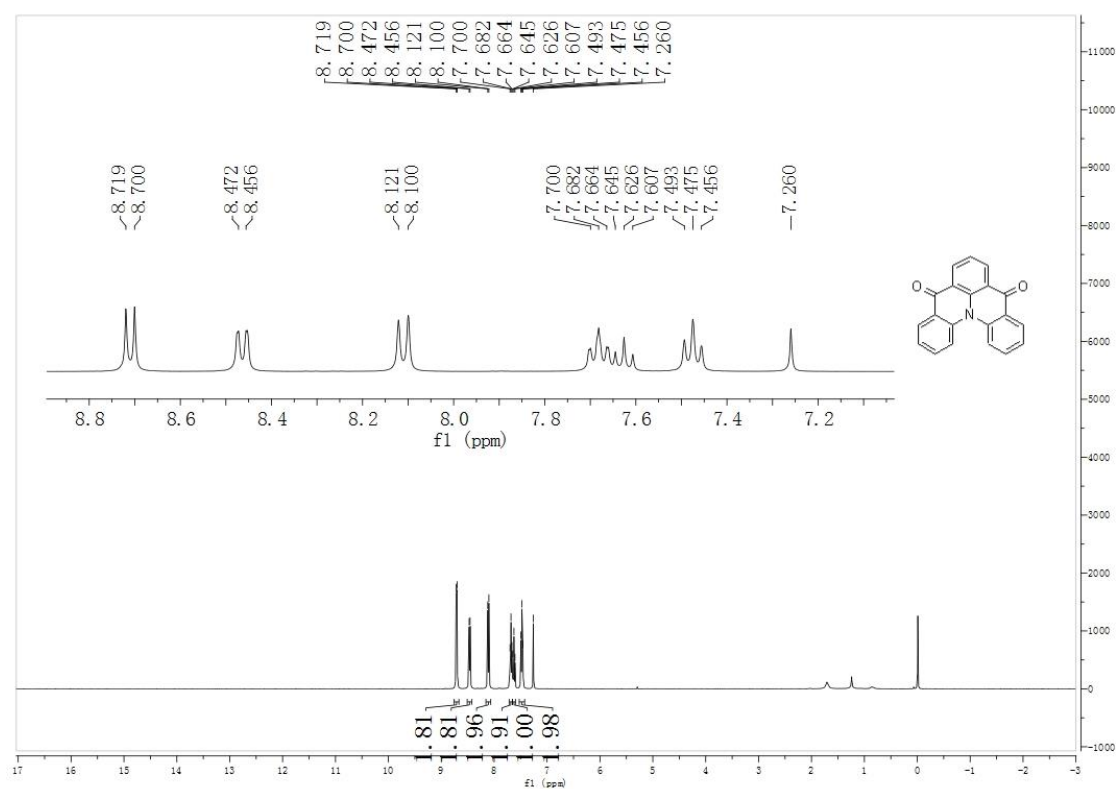

<sup>13</sup>C NMR spectrum of QAO (CDCl<sub>3</sub>)

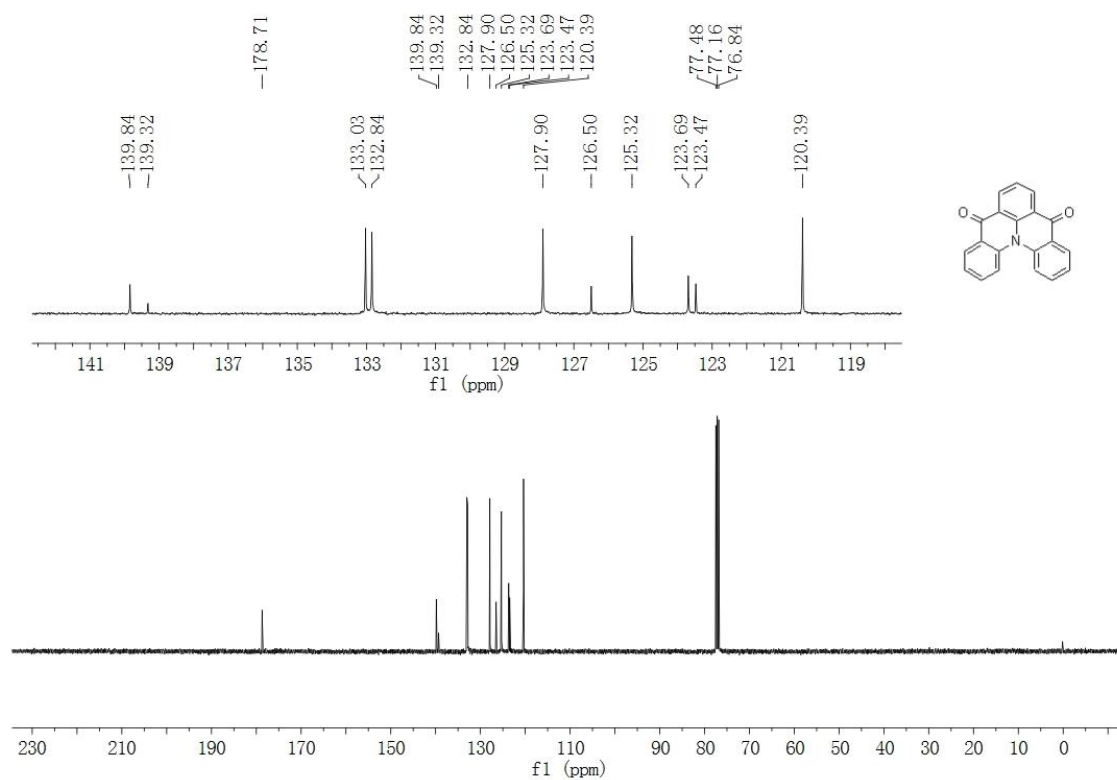

## IX. Copies of HPLC spectra

### HPLC trace of *pe*-QAO

#### <Sample Information>

Sample Name : *pe*-QAO  
Method Filename : 4%-0.6 mL/min  
Injection Volume : 10  $\mu$ L

#### <Chromatogram>

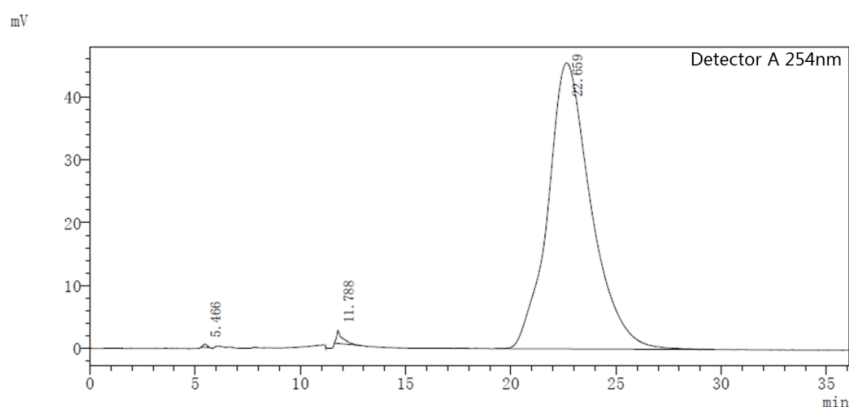

#### *pe*-QAO

| Peak# | Ret. Time | Area    | Height | Area%  |
|-------|-----------|---------|--------|--------|
| 1     | 5.466     | 6040    | 484    | 0.093  |
| 2     | 11.788    | 41061   | 2085   | 0.629  |
| 3     | 22.659    | 6475731 | 45451  | 99.278 |
| Total |           | 6522832 | 48020  |        |

### HPLC trace of QAO

#### <Sample Information>

Sample Name : QAO  
Method Filename : 3%-0.7 mL/min  
Injection Volume : 6  $\mu$ L

#### <Chromatogram>

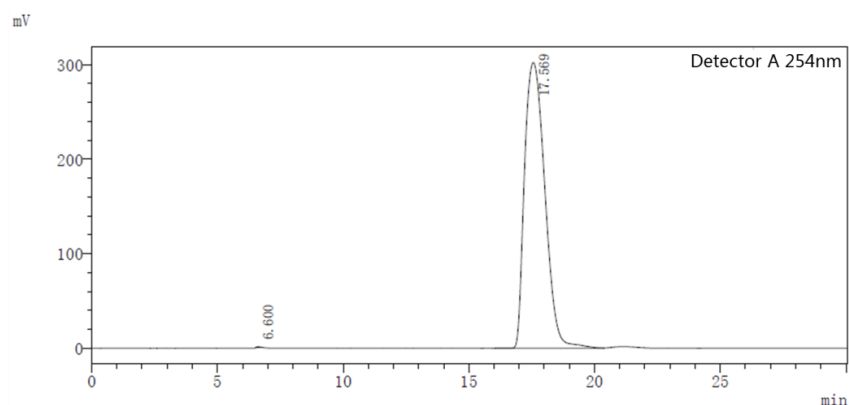

#### QAO

| Peak# | Ret. Time | Area     | Height | Area%  |
|-------|-----------|----------|--------|--------|
| 1     | 6.600     | 4285     | 595    | 0.025  |
| 2     | 17.569    | 16981683 | 302197 | 99.975 |
| Total |           | 16985968 | 302792 |        |

## HPLC trace of [5]he-BQAO

### <Sample Information>

Sample Name : [5]he-BQAO  
Method Filename : 3%-0.7 mL/min  
Injection Volume : 4  $\mu$ L

### <Chromatogram>

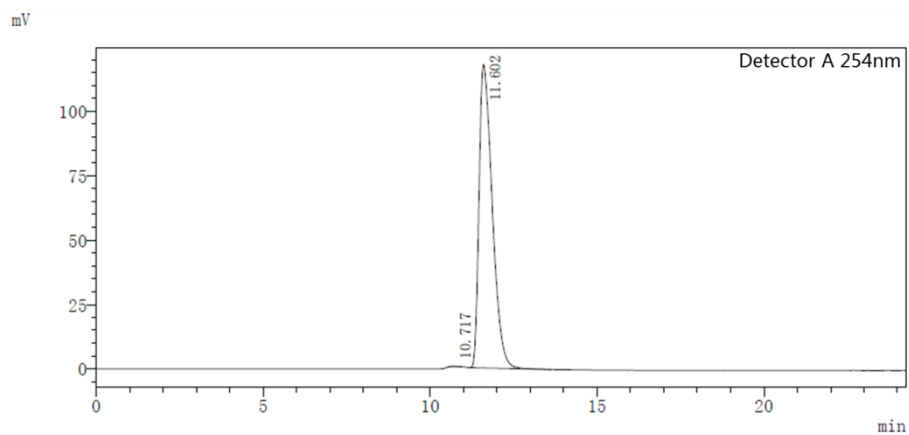

### [5]he-BQAO

| Peak# | Ret. Time | Area    | Height | Area%  |
|-------|-----------|---------|--------|--------|
| 1     | 10.717    | 4806    | 323    | 0.148  |
| 2     | 11.602    | 3234697 | 117698 | 99.852 |
| Total |           | 3239503 | 118021 |        |

## HPLC trace of [6]he-BQAO

### <Sample Information>

Sample Name : [6]he-BQAO  
Method Filename : 3%-0.7 mL/min  
Injection Volume : 6  $\mu$ L

### <Chromatogram>

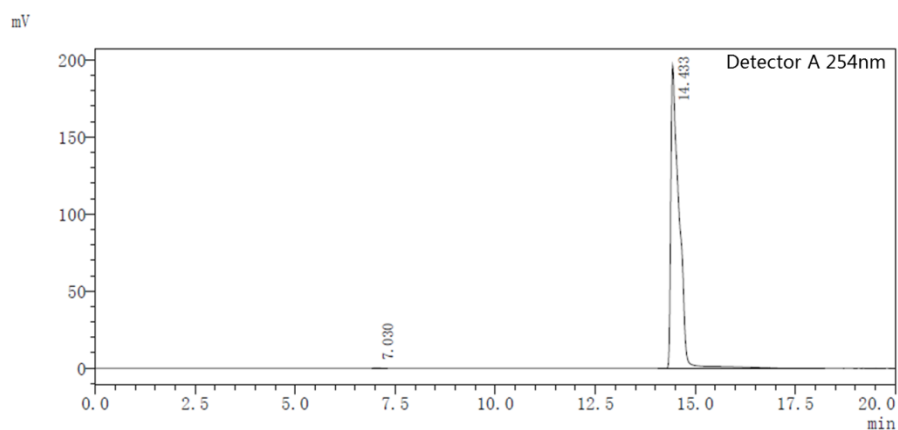

### [6]he-BQAO

| Peak# | Ret. Time | Area    | Height | Area%  |
|-------|-----------|---------|--------|--------|
| 1     | 7.030     | 1469    | 115    | 0.052  |
| 2     | 14.433    | 2845481 | 196606 | 99.948 |
| Total |           | 2846950 | 196721 |        |

# HPLC trace of *hp*-BQAO

## <Sample Information>

Sample Name : *hp*-BQAO  
Method Filename : 4%-0.7 mL/min  
Injection Volume : 6  $\mu$ L

## <Chromatogram>

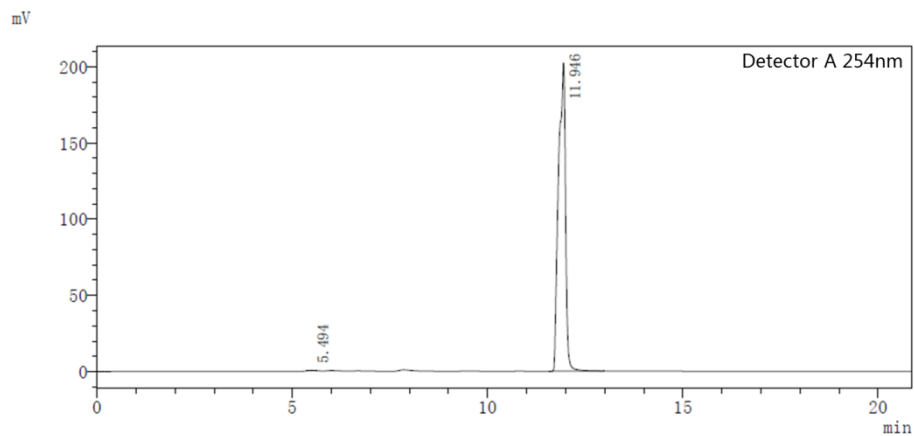

### *hp*-BQAO

| Peak# | Ret. Time | Area    | Height | Area%  |
|-------|-----------|---------|--------|--------|
| 1     | 5.494     | 1946    | 216    | 0.077  |
| 2     | 11.946    | 2517664 | 201854 | 99.923 |
| Total |           | 2519610 | 202070 |        |
